# Supplementary material for: neoDL: a novel neoantigen intrinsic feature-based deep learning model identifies IDH wild-type glioblastomas with the longest survival
Source: BMC Bioinformatics. 2021 Jul 23;22:382. doi: 10.1186/s12859-021-04301-6 (PMC8299600; doi:10.1186/s12859-021-04301-6)
Supplement: Supplementary file 1 — Additional file 1. Description of neoDL and supplementary results. [file 12859_2021_4301_MOESM1_ESM.pdf]

# **neoDL: A novel neoantigen intrinsic feature-based deep learning model identifies IDH wild-type glioblastomas with the longest survival**

Ting Sun<sup>1,\*</sup>, Yufei He<sup>1,\*</sup>, Wendong Li<sup>1,\*</sup>, Guang Liu<sup>1</sup>, Lin Li<sup>1</sup>, Lu Wang<sup>1</sup>, Zixuan Xiao<sup>1</sup>, Xiaohan Han<sup>1</sup>, Hao Wen<sup>1</sup>, Yong Liu<sup>1</sup>, Yifan Chen<sup>1</sup>, Haoyu Wang<sup>1</sup>, Jing Li<sup>1</sup>, Yubo Fan<sup>1,#</sup>, Wei Zhang<sup>2,3,#</sup>, Jing Zhang<sup>1,#</sup>

## **Materials and Methods**

Supplementary Figure S1. Flow chart of neoDL.

Supplementary Figure S2. Survival of glioma patients stratified according to missense mutational load.

Supplementary Figure S3. Survival of glioma patients stratified according to absolute number of neoantigens.

Supplementary Figure S4. Survival of glioma patients stratified according to differential antigenicity index (DAI).

Supplementary Figure S5. Heat map representing Spearman correlation between each valid feature.

Supplementary Figure S6. Forest plot for 12 peptide features in Pri cohort.

Supplementary Figure S7. Relationship between the number of iterations and loss/accuracy.

Supplementary Figure S8. Survival of TCGA glioma patients stratified by deep learning model.

Supplementary Figure S9. Comparison of the similarity of valid feature values between long-term survival and short-term survival groups of IDH wild-type GBM in two cohorts.

Supplementary Figure S10. Survival of glioma patients stratified according to 2 feature values, and analysis of the correlations between these features in two cohorts.

Supplementary Figure S11. Comparison of the similarity of immune score and stromal score between two groups and the correlation analysis between purity and mutation load.

Supplementary Table S1. Multivariate Cox regression analysis including position 3-4 composed-dipeptide VHSE-scale 2 value, mutation load and age for TCGA IDH wild type GBM (n=262).

Supplementary Table S2. Multivariate Cox regression analysis including position 3-4 composed-dipeptide VHSE-scale 2 value, mutation load and age for Pri IDH wild type GBM (n=42).

Supplementary Table S3. Multivariate Cox regression analysis including position 3-4 composed-dipeptide protFP 2 value, mutation load and age for TCGA IDH wild type GBM (n=262).

Supplementary Table S4. Multivariate Cox regression analysis including position 3-4 composed-dipeptide protFP 2 value, mutation load and age for Pri IDH wild type GBM (n=42).

Supplementary Table S5. Functional annotation for the lists of genes differentially expressed analyzed by GSEA in TCGA cohort.

Supplementary Table S6. Functional annotation for the lists of genes differentially expressed analyzed

by GSEA in Pri cohort.

Supplementary Table S7. Comparison of the effects of neoDL with two other methods.

Supplementary Table S8. Total features used in neoDL.

Supplementary Table S9. 189 features characterized by immunogenicity after screening.

## Materials and Methods

### Data Description

Mutations and clinical information were downloaded from the ATLAS-TCGA pan-glioma study (Ceccarelli, et al., 2016). Gene expression microarray data with Agilent chip (G4502A) at level 3 were downloaded from TCGA Data portal. We termed the data from TCGA as TCGA cohort. Mutations, RNAseq gene expression data, and clinical information in Asian population were collected from a recently published cohort (Wang, et al., 2016), designated as Pri cohort. The samples that were not diagnosed as IDH wild-type GBM or did not have clinical information were removed, resulting in 268 and 46 samples in the two cohorts, respectively.

A neoepitope with strong affinity for MHC ( $IC_{50}$  equal or less than 500 nM) may be a more robust neoantigen candidate if the paired wild-type epitope has a poor affinity for MHC ( $IC_{50}$  greater than 500 nM) (Wood, et al., 2018). The neoantigens for each sample in both TCGA cohort and Pri cohort were from our previous study (Zhang, et al., 2019), which used missense mutations to generate all possible 9-mer peptides and defined the mutant 9-mer peptides as neoantigens when the  $IC_{50}$  of mutant-type 9-mer peptides was less than 500 nM and the corresponding wild-type binder more than 500 nM. All the downstream analyses were based on the inferred neoantigens (the mutant peptides) and their corresponding wild-type peptides.

### Feature calculation for neoantigens

For the purpose of extracting features from neoantigens, the samples with detected mutant

peptides remained in the downstream analysis, including 262 samples in the TCGA cohort and 42 samples in Pri cohort. A total of 2928 features were extracted from 2263 neoantigens (2081 for TCGA cohort; 182 for Pri cohort) in the downstream analysis. Specifically, features used in the calculation were derived using the R package "Peptides"(v2.4.2) including 66 amino acid descriptors and physical-chemical properties (aliphatic, auto-correlation, auto-covariance, Boman index, theoretical net charge, cross-covariance, hydrophobic moment, hydrophobicity, instability, molecular weight). Additionally, the "aaComp" command was also used to describe amino acid features including Tiny, Small, Aliphatic, Aromatic, Non-polar, Polar, Basic, Acidic. Variables were derived by the presence (1) or absence (0) of each feature. Characteristic variables were performed in four conditions respectively, including the complete sequence, the site of mutation along with each antigen and the dipeptides/tripeptides related to the mutation site, each absolute position along each antigen and related dipeptide/tripeptide composition, and the difference of each feature in the mutated versus reference antigen.

The features, described overall content of a protein, for example, amino acid composition, were significant. Variables demonstrating presence(1) or absence(0) of each amino acid type following, including the first or last 3 amino acid residues or middle residues of each antigen, the first or last amino acid residues of each antigen, the first or last 2 amino acid residues or middle residues of each antigen.

To measure the complexity at the protein and residue level, we computed Shannon entropy of a protein and entropy of each type of residues using the following equations:

$$HS = - \sum_{i=1}^{20} p_i \log_2 p_i$$

$$HR_i = -p_i \log_2 p_i$$

where HS is Shannon entropy of a protein sequence and  $HR_i$  is the entropy of a residue type  $i$ .  $p_i$  is the probability of the existence of a given amino acid in the sequence. We calculated the Shannon entropy of the mutant peptides and the difference of Shannon entropy in the mutant antigen versus reference antigen. Cancer is characterized by the accumulation of mutations, so the analysis of mutant positions is valid. Therefore, the Shannon entropy of the dipeptides/tripeptides related to the mutation site and the entropy difference of mutations process were performed. The entropy of a residue type was also calculated for the mutant peptides and reference peptides.

### **Prognostic feature selection**

The features were calculated for all detected 9-mer mutated peptides and wild peptides. There were multiple types of mutations in each patient, resulting in a large number of mutant peptides in total. Thus, each feature value calculated in all the peptides detected in a patient was averaged as the final value. Univariate Cox regression analysis was performed here to predict the impact of each feature on prognosis. The threshold of P-value was set as 0.05, which means all the features with P-value lower than or equal to 0.05 were deemed as statistically significant (termed as valid features). A correlation matrix of the valid features was conducted, and visualized through heatmaps using the package ‘pheatmap’ in R language.

### **Hierarchical k-means clustering**

Hierarchical k-means clustering was applied upon the Z-Score-transformed valid features to stratify patients into two clusters. Hierarchical k-means was performed using the "hkmeans" command of the R package ‘factoextra’ (version 1.0.7). The overall survival differences between

two clusters of patients were compared through Kaplan-Meier survival analysis.

### **Deep-learning model construction**

The grouping results derived from hierarchical k-means clustering were used as labels, marking 0 and 1. The valid features in the TCGA cohort were used as training data to train the deep learning model. The input data were Z-Score-transformed valid features, in order to avoid gradient disappearance problem. The LSTM deep learning model was built with three hidden layers, including two LSTM layers and one fully connected layer, each layer containing 128, 32, and 8 nodes, respectively. We chose the Sigmoid function as neuron activation function for fully connected layer, since we want to map the original statistics to a single number with domain of 0-1 through learning, which refers to the final classification result. The original data are normalized using z-score, therefore no serious gradient vanishing problem would be caused when using Sigmoid function as activation function. For hyperparameters, we chose MSE as the loss function and Adam as the iterative optimizer with the number of iterations set as 1000. MSE is a commonly used loss function in regression problem, thus we utilized such function to calculate the preference of a sample. The maximum number of iterations was set as 1000. The initial connection weights and biases of each layer were randomly generated, and end up reaching stable parameters through training iterations.

### **Leave one out cross validation (LOOCV)**

After determining the framework of the model, cross validation was a necessary step. Specifically, the training data was separated into two sections randomly with proportion of training and testing sets as 6 to 4. The training set was used to train the model to determine the unknown parameters, while the test set was used to validate the effect of the predicted parameters. To obtain the optimal model, the above process was carried out 300 times. Kaplan-Meier survival analysis was operated each time to see if the model can divide the samples into two groups with a statistically significant survival difference. Only groups with P-value lower than or equal to the threshold of 0.05 were regarded as statistically significant. Among 300 times trial, the more significant stratifications, the more stable our model is.

## **Independent validation**

A model with fixed parameters corresponding to the lowest P-value was selected as the optimal model. To test the performance of the optimal model, Pri cohort was used as an external test data. The optimal model divided patients in the Pri cohort into long- and short-term survival clusters. Kaplan Meier analysis was conducted between the long- and short-term survival clusters in Pri cohort to test the predictive performance of the optimal model for IDH wild-type GBMs. Besides, other glioma subtypes from TCGA data were also tested by the model, including Astrocytoma, Classical-like, Classical, Codel, Glioblastoma, G-CIMP-high, IDH-MT-codel, IDH-MT-noncodel, IDH-MT, IDH-WT, Mesenchymal-like, Mesenchymal, Neural, Oligodendroglioma, Proneural and OligoAstrocytoma.

## **Tumor purity estimation**

Tumor purities were estimated by ESTIMATE(Yoshihara, et al., 2013) from gene expression profiles. There were a total of 242 and 29 IDH wild-type GBMs in the TCGA cohort and Pri cohort with gene expression profiles available, respectively. The purity score was performed for each sample, using the R package ‘estimate’(version 1.6.7). Meanwhile, the immune score and the stromal score were also estimated.

## **GO enrichment analysis**

To identify differential genes expression between different groups, GO enrichment analysis was conducted using Gene Set Enrichment Analysis (GSEA 4.0.3)(Subramanian, et al., 2005), with 17814 and 23491 genes available in the TCGA cohort and Pri cohort, respectively. The GO terms were collected from the Molecular Signatures Database (c5.all.v6.2.symbols.gmt), including

cellular component, molecular function, and biological process. Number of Permutations was set to 1000 and gene set size filters were 15-500. Gene sets with FDR < 0.05 were considered as differentially expressed, and visualized using Cytoscape(Shannon, et al., 2003). The grouping results of GO terms were shown in Supplementary Table S5-S6.

## Statistical Analysis

All statistical analyses were performed using R software, version 4.0.0. Continuous variables between groups were compared by the unpaired T test. Correlations between continuous variables were evaluated by Pearson correlation analyses. For all statistical analyses, the P value of 0.05 was taken as the significant threshold in all tests. Kaplan-Meier survival analysis curves were compared using a log-rank test and Multivariate survival analysis was performed by Cox regression model using R package "survminer" and "survival". All analyses were conducted in R language and Python language.

Ceccarelli, M., *et al.*(2016) Molecular Profiling Reveals Biologically Discrete Subsets and Pathways of Progression in Diffuse Glioma. *Cell*;164(3):550-563.

Shannon, P., *et al.*(2003) Cytoscape: a software environment for integrated models of biomolecular interaction networks. *Genome Res*;13(11):2498-2504.

Subramanian, A., *et al.*(2005) Gene set enrichment analysis: a knowledge-based approach for interpreting genome-wide expression profiles. *Proc Natl Acad Sci U S A*;102(43):15545-15550. Wang, J., *et al.*(2016) Clonal evolution of glioblastoma under therapy. *Nat Genet*;48(7):768-776. Wood, M.A., *et al.*(2018) Population-level distribution and putative immunogenicity of cancer neoepitopes. *BMC Cancer*;18(1):414.

Yoshihara, K., *et al.*(2013) Inferring tumour purity and stromal and immune cell admixture from expression data. *Nat Commun*;4:2612.

Zhang, J., *et al.*(2019) The combination of neoantigen quality and T lymphocyte infiltrates identifies glioblastomas with the longest survival. *Commun Biol*;2:135.

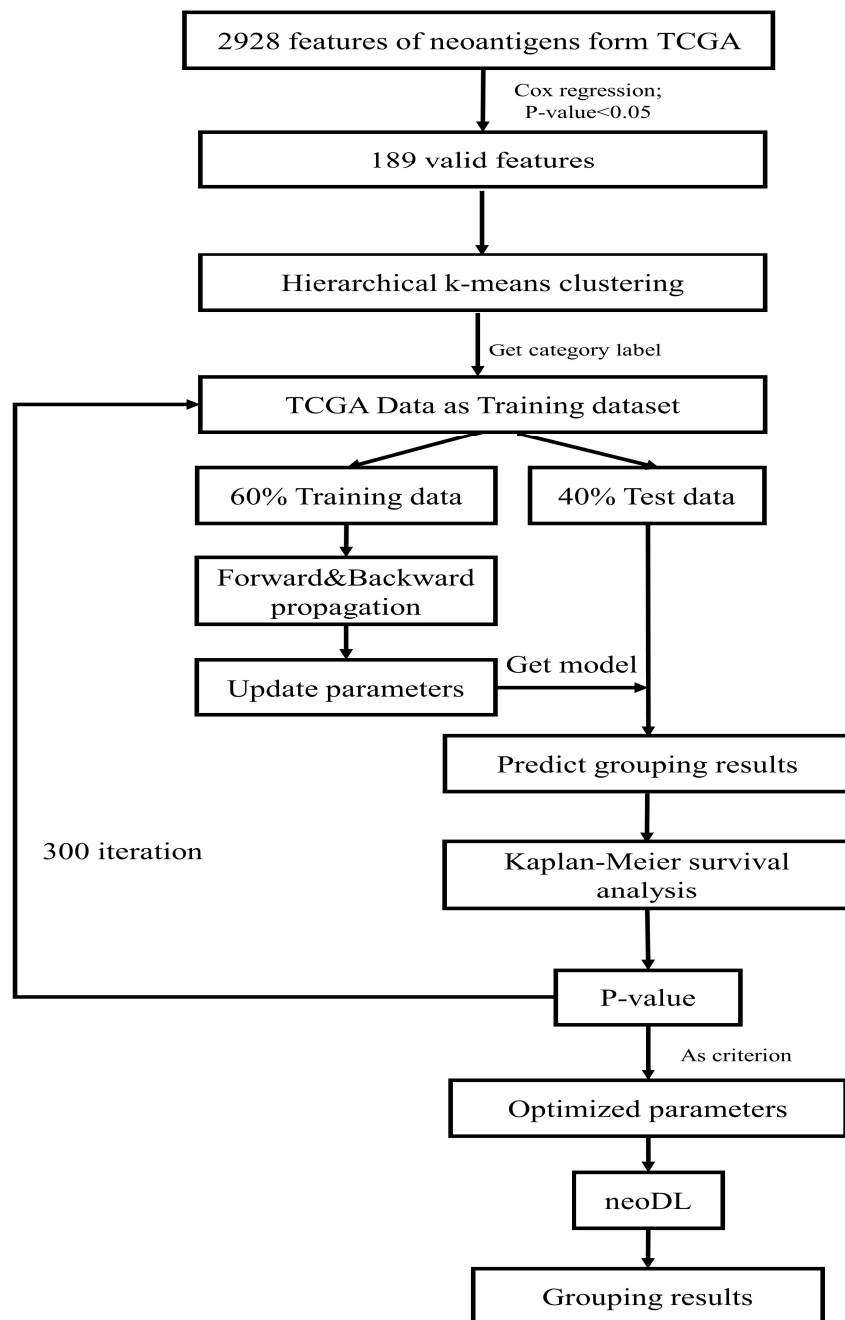

**Supplementary Figure S1.** Flow chart of neoDL. The flow chart contains three parts: extracting neoantigen-features, training process (that was done with 300 iterations) and applying in an independent data set.

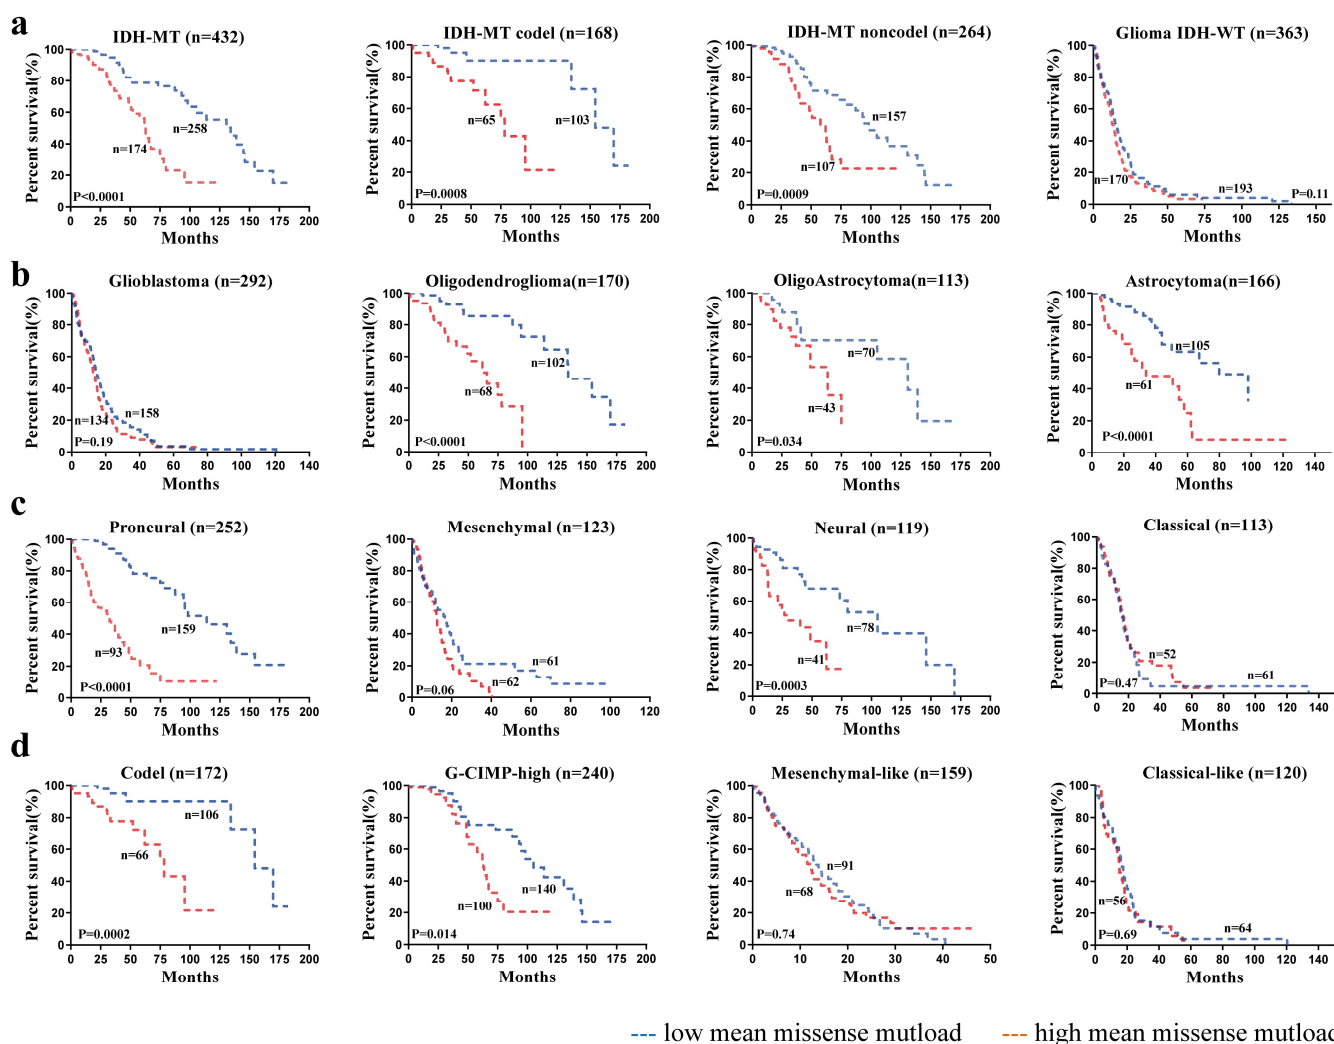

**Supplementary Figure S2.** Survival of glioma patients stratified according to missense mutational load. **a**, Glioma IDH status sub-groups; **b**, Glioma histology sub-groups; **c**, Glioma transcriptomic sub-groups; **d**, Glioma DNA methylation sub-groups. red line, high mean mutational load; blue line, low mean mutational load; n, number of patients; p-value was determined using the log-rank test.

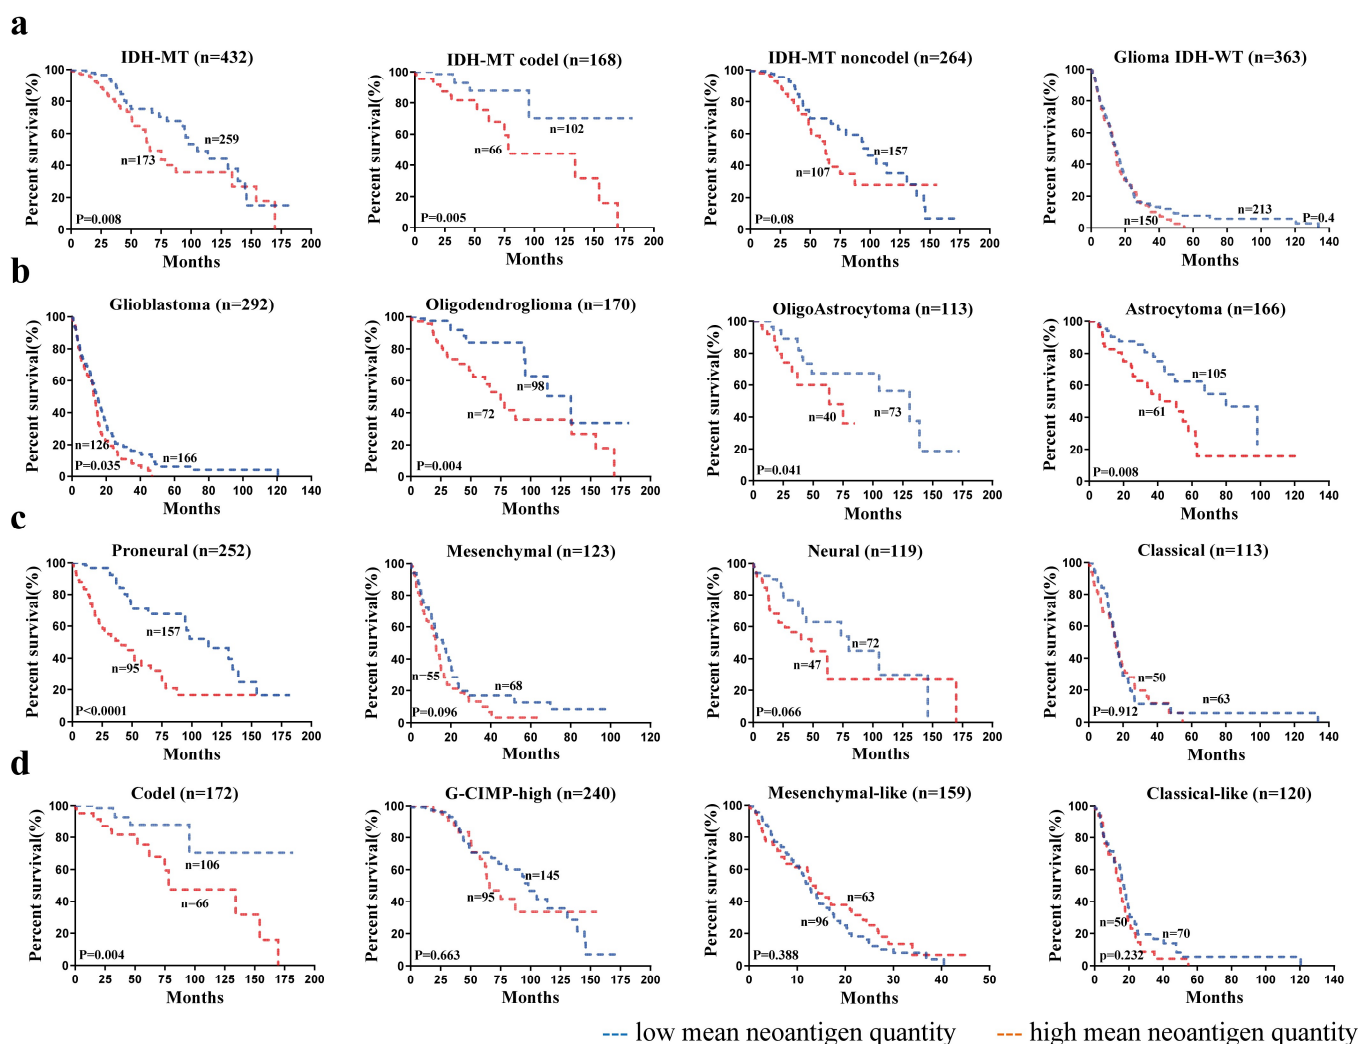

**Supplementary Figure S3.** Survival of glioma patients stratified according to absolute number of neoantigens. **a**, Glioma IDH status sub-groups; **b**, Glioma histology sub-groups; **c**, Glioma transcriptomic sub-groups; **d**, Glioma DNA methylation sub-groups. red line, high mean mutational load; blue line, low mean mutational load; n, number of patients; p-value was determined using the log-rank test.

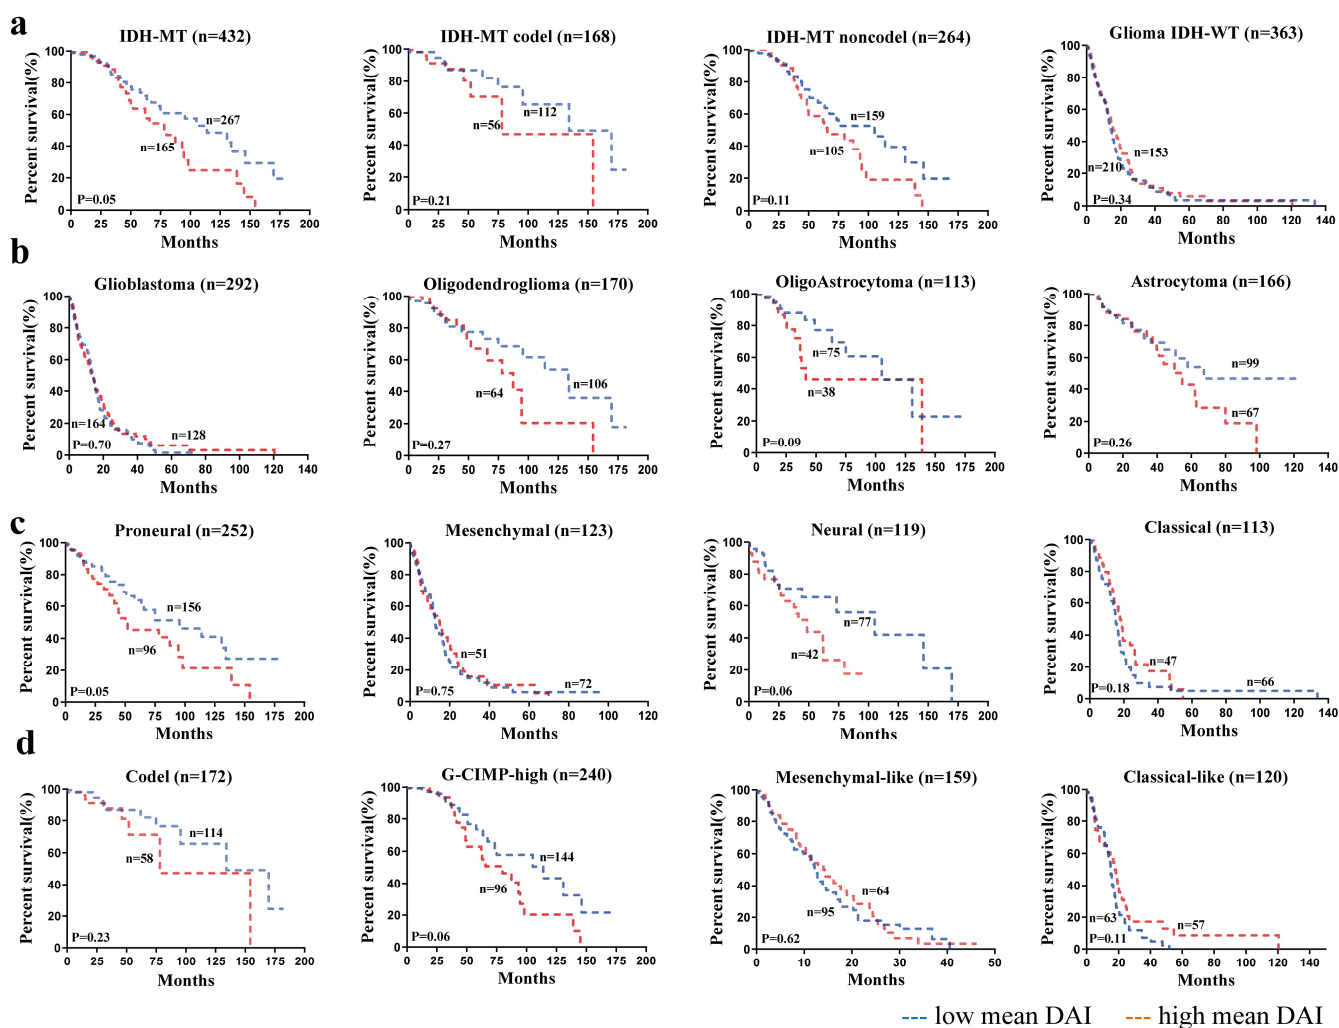

**Supplementary Figure S4.** Survival of glioma patients stratified according to differential agretopicity index (DAI). **a**, Glioma IDH status sub-groups; **b**, Glioma histology sub-groups; **c**, Glioma transcriptomic sub-groups; **d**, Glioma DNA methylation sub-groups. red line, high mean DAI; blue line, low mean DAI; n, number of patients; p-value was determined using the log-rank test.

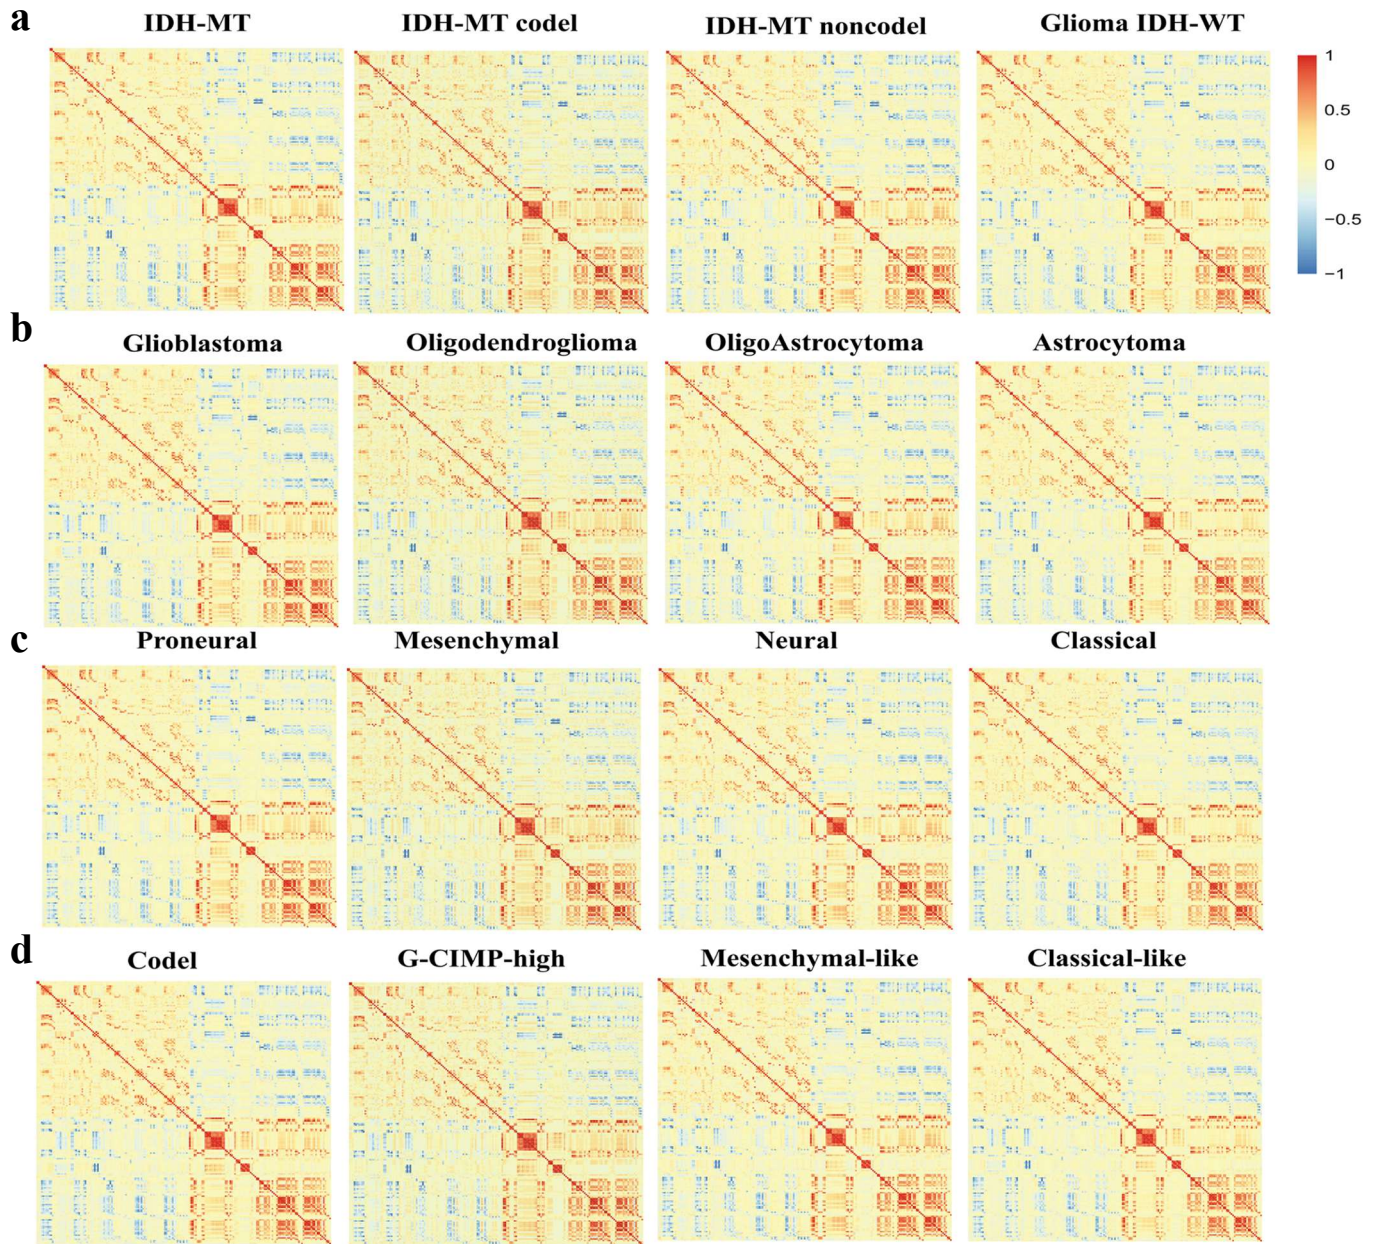

**Supplementary Figure S5.** Heat map representing Spearman correlations between each valid feature. Magnitude of the correlation coefficient represented by color. **a**, Glioma IDH status sub-groups; **b**, Glioma histology sub-groups; **c**, Glioma transcriptomic sub-groups; **d**, Glioma DNA methylation sub-groups.

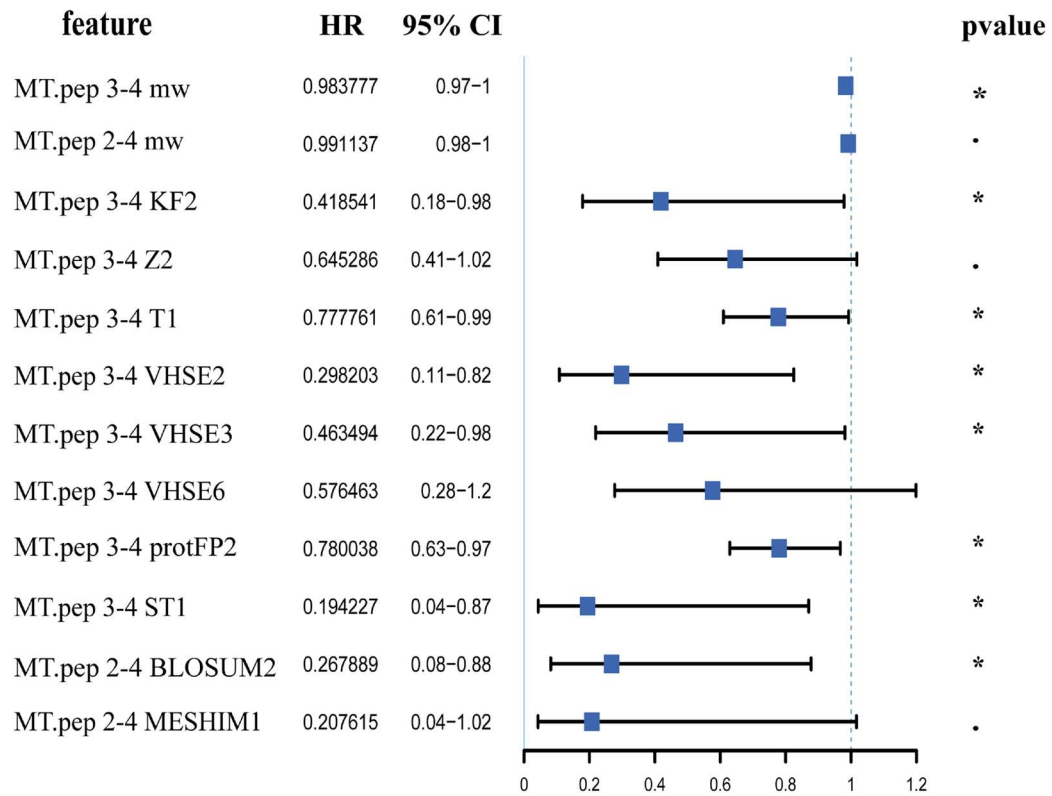

**Supplementary Figure S6.** forest plot for 12 peptide features in Pri cohort. · pvalue<0.1;\* pvalue<0.05;\*\* pvalue<0.01. HR value and pvalue derived by cox regression.

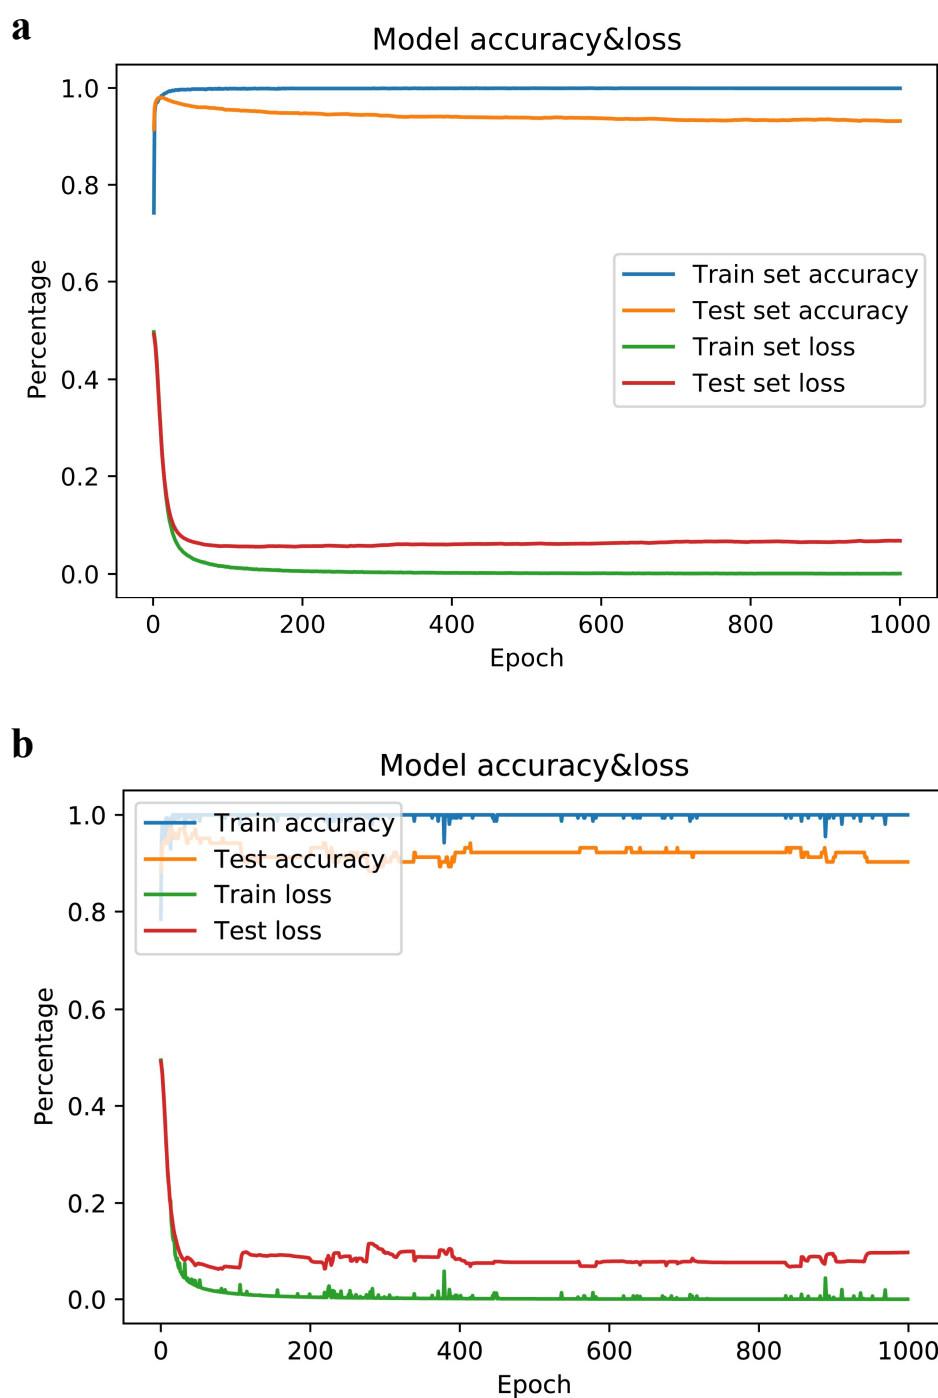

**Supplementary Figure S7. a.** Relationship between the number of iterations and loss/accuracy. The number of iterations is set to 1000, and the loss/accuracy change curves are the average value of 300 iteration. **b.** the process of gaining our optimized model. There are four lines shown below, which are train set accuracy, test set accuracy, train set loss, test set loss.

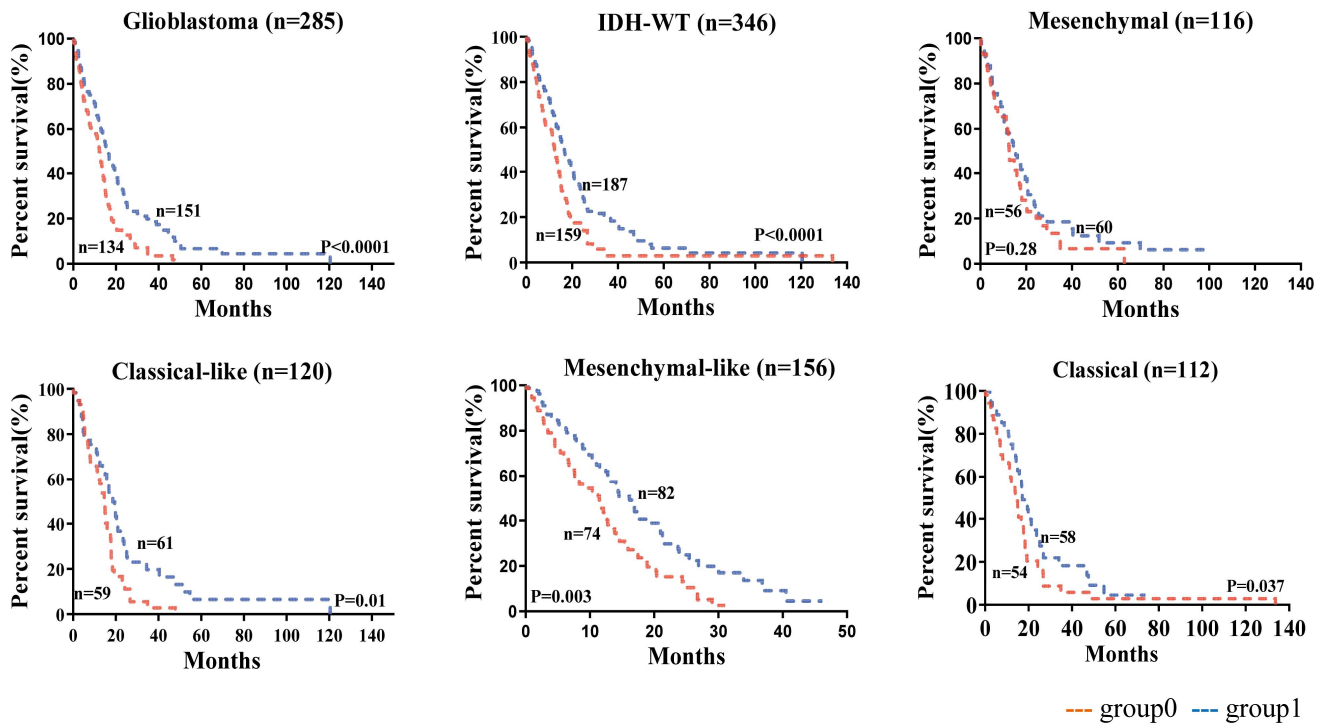

**Supplementary Figure S8.** Survival of TCGA glioma patients stratified by deep learning model .red line, the deep learning model prediction label is 0; blue line, model prediction label is 1. n, number of patients; p-value was determined using the log-rank test.

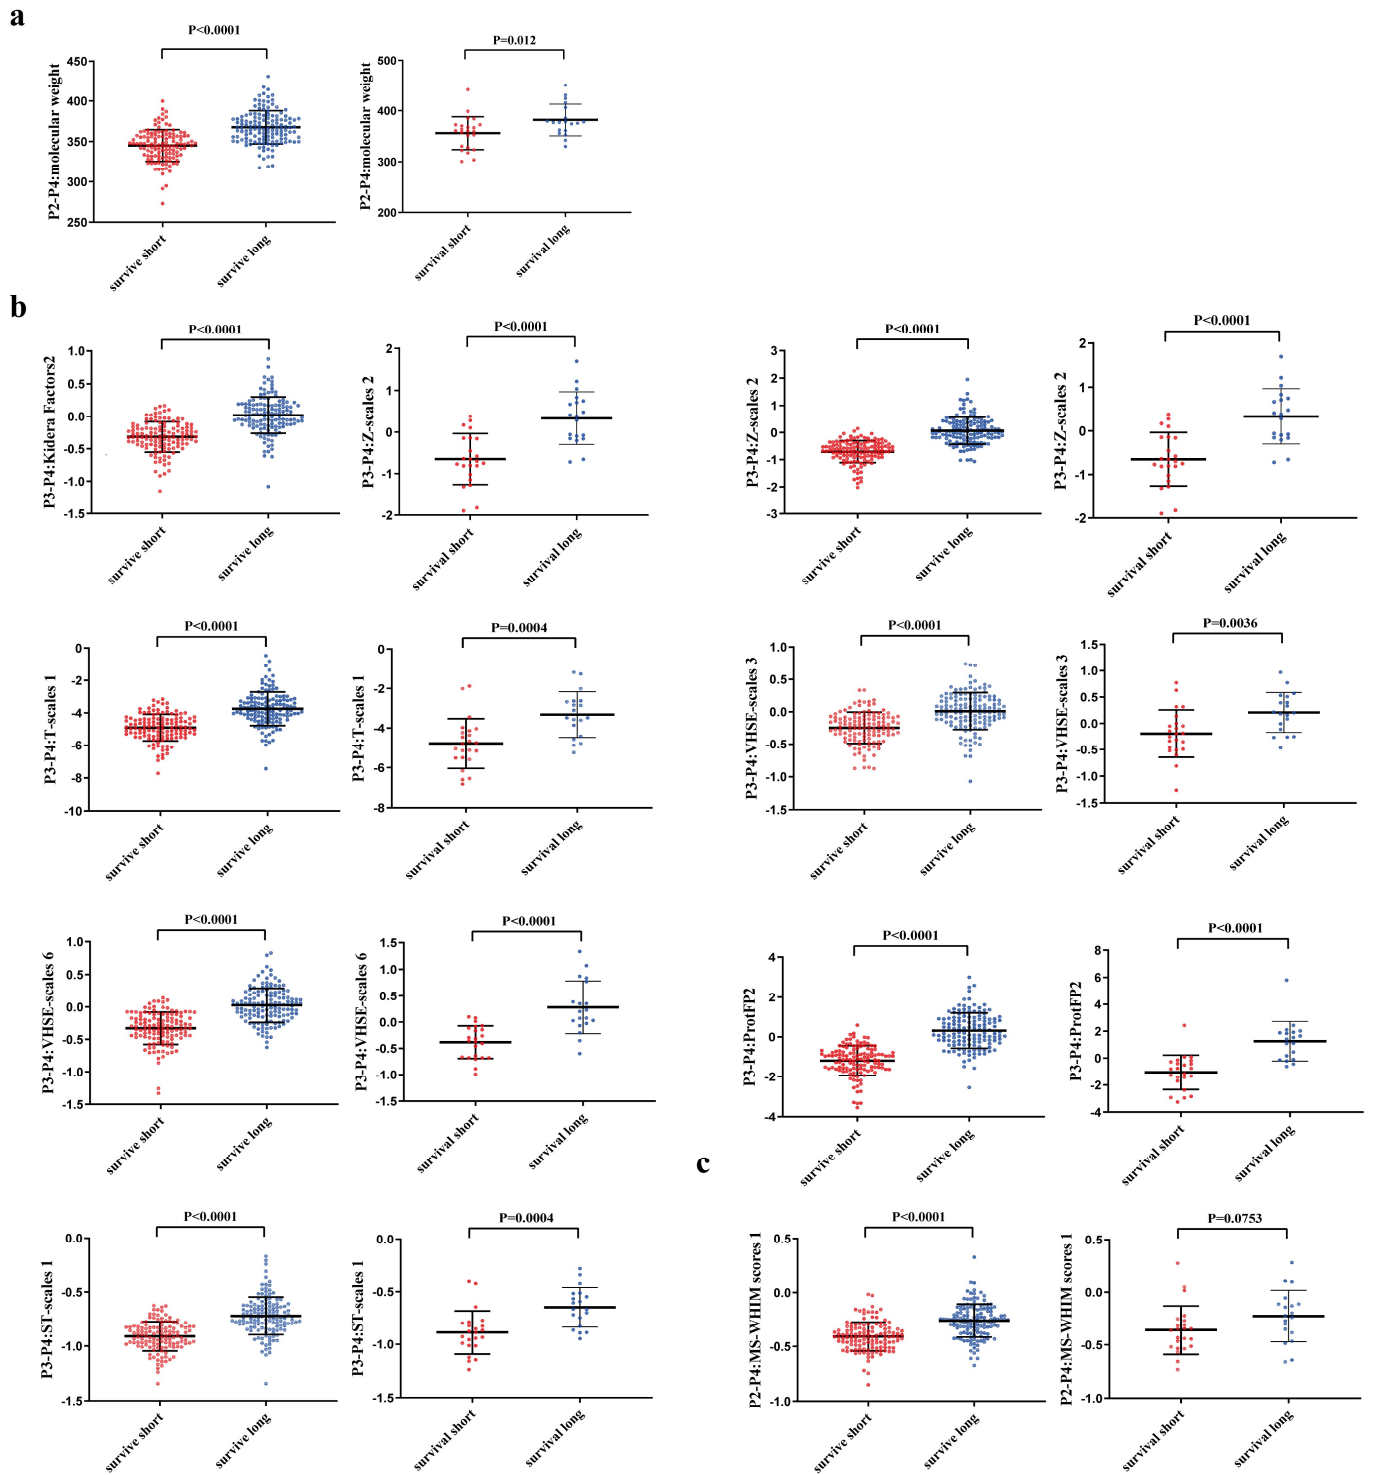

**Supplementary Figure S9.** Comparison of the similarity of valid feature values between long-term survival and short-term survival groups of IDH wild-type GBM in two cohorts. **a**, molecular weight related features. **b**, molecular size/volume related features. **c**, molecular electrostatic potential/polarity related features. P-value was calculated by unpaired T test. ). The left and the right col contain the TCGA cohort and Pri cohort, respectively.

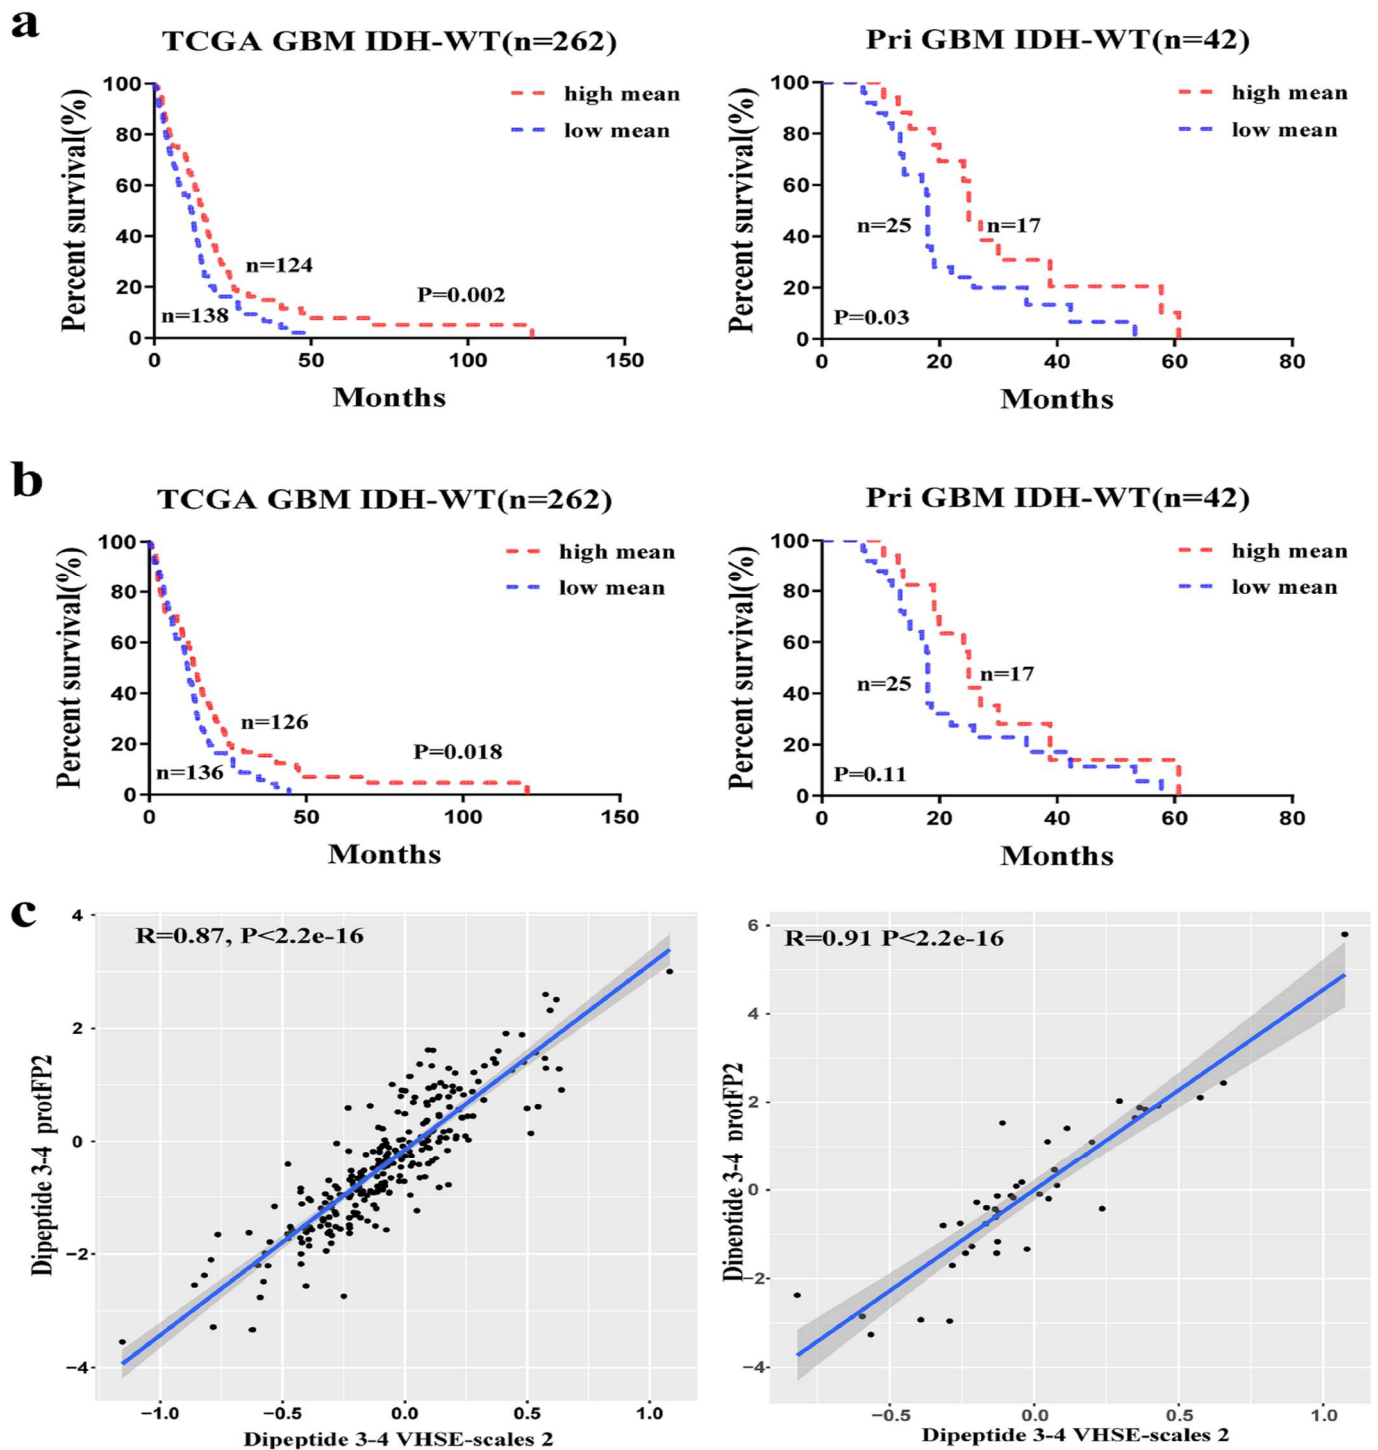

**Supplementary Figure S10.** Survival of glioma patients stratified according to 2 feature values, and analysis of the correlations between these features in two cohorts. **a**, absolute position 3 and 4 composed-dipeptide protFP2 value ; **b**, absolute position 3 and 4 composed-dipeptide VHSE-scale 2. red line, high mean value, blue , low mean value; n, number of patients; p-value was determined using the log-rank test. **c**, the Pearson correlation coefficient of the two features. The left and the right col contain the TCGA cohort and Pri cohort, respectively.

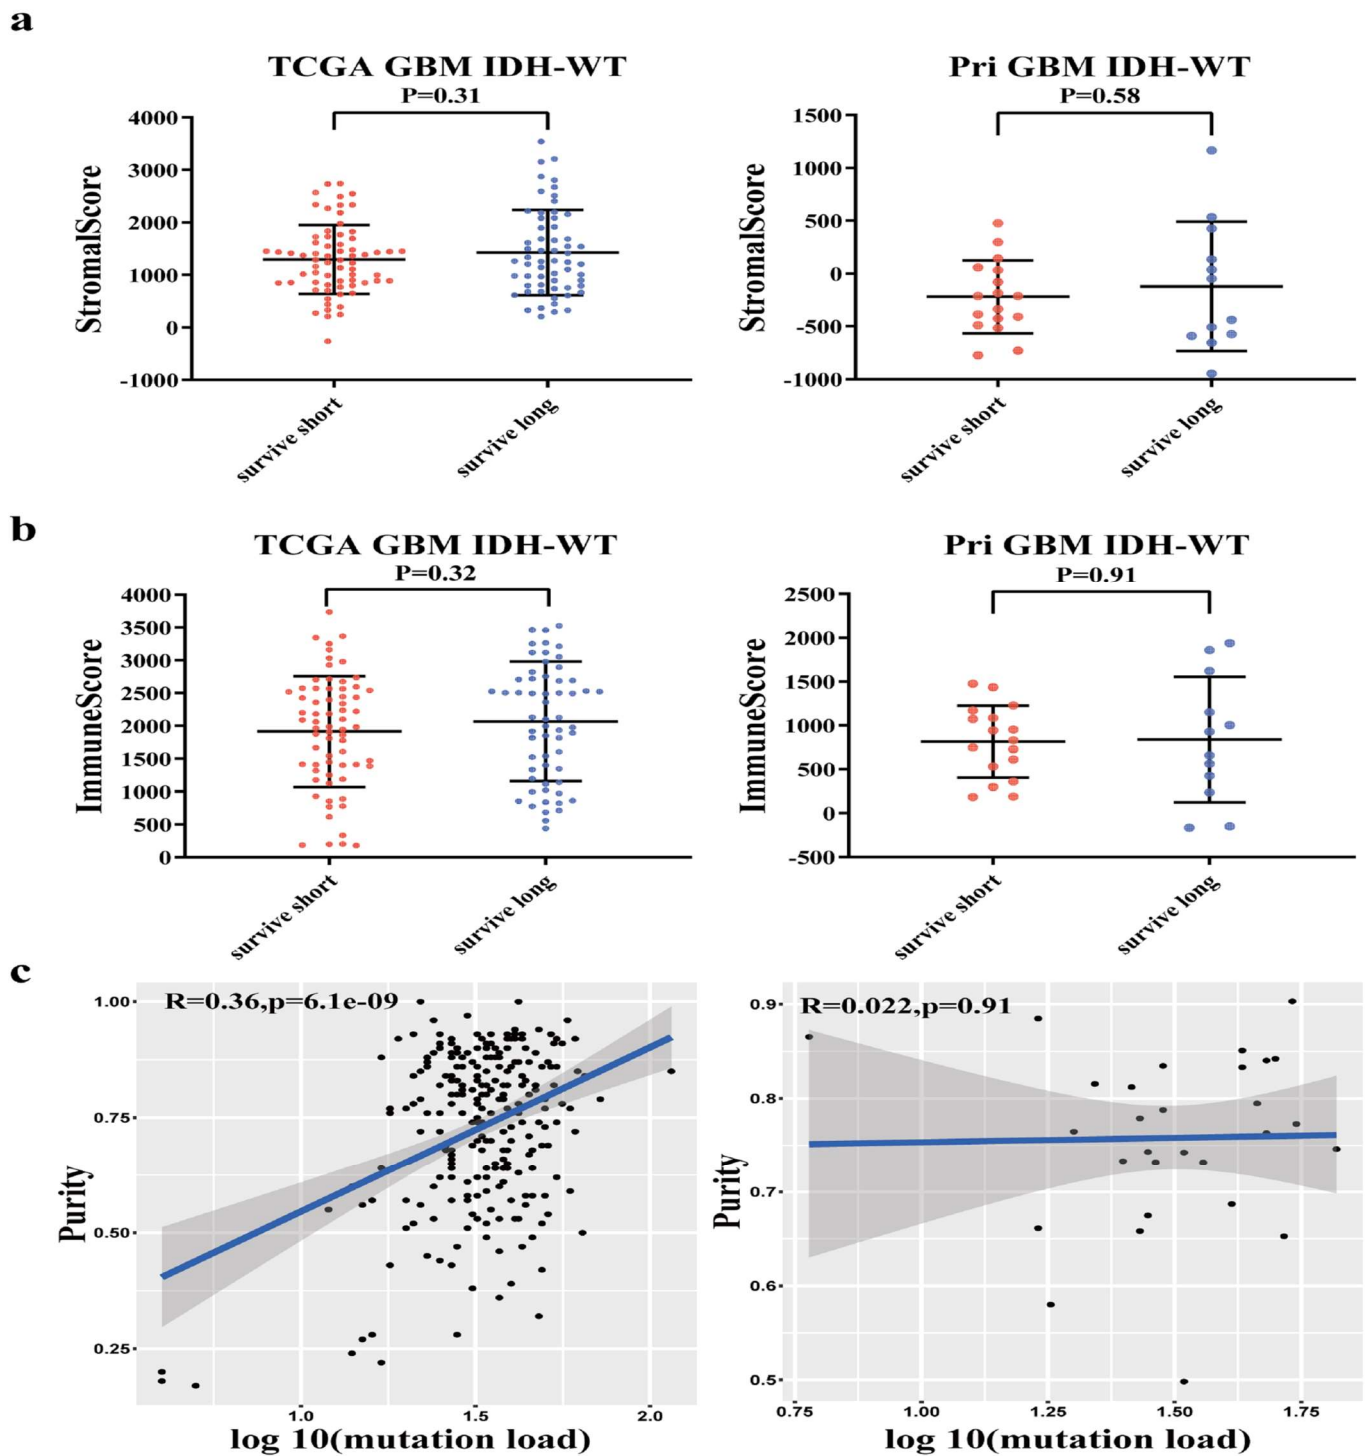

**Supplementary Figure S11.** Comparison of the similarity of immune score and stromal score between two groups and the correlation analysis between purity and mutation load. **a**, stromal score. **b**, immune score. Immune score and stromal score were derived by ESTIMATE. P value was calculated by unpaired T test. **c**, pearson correlation between purity and log<sub>10</sub>(mutation load). The left and the right col contain the TCGA cohort and Pri cohort, respectively.

**Supplementary Table S1. Multivariate Cox regression analysis including position 3-4 composed-dipeptide VHSE-scale 2 value, mutation load and age for TCGA IDH wild type GBM (n=262).**

| TCGA cohort (n=262) | HR     | 95%CI           | P        |
|---------------------|--------|-----------------|----------|
| Age                 | 1.0306 | [1.0163,1.0452] | 2.42e-05 |
| Mutation load       | 0.9866 | [0.9729,1.0005] | 0.0595   |
| Dipeptide 3-4 VHSE2 | 0.5732 | [0.3661,0.8972] | 0.0149   |

**Supplementary Table S2. Multivariate Cox regression analysis including position 3-4 composed-dipeptide VHSE-scale 2 value, mutation load and age for Pri IDH wild type GBM (n=42).**

| Pri cohort (n=42)   | HR     | 95%CI           | P      |
|---------------------|--------|-----------------|--------|
| Age                 | 1.0230 | [0.9914,1.0555] | 0.1555 |
| Mutation load       | 1.0047 | [0.9872,1.0226] | 0.6011 |
| Dipeptide 3-4 VHSE2 | 0.3327 | [0.1120,0.9885] | 0.0476 |

**Supplementary Table S3. Multivariate Cox regression analysis including position 3-4 composed-dipeptide protFP 2 value, mutation load and age for TCGA IDH wild type GBM (n=262).**

| TCGA cohort (n=262)   | HR     | 95%CI           | P        |
|-----------------------|--------|-----------------|----------|
| Age                   | 1.0303 | [1.0159,1.0449] | 3.19e-05 |
| Mutation load         | 0.9865 | [0.9727,1.0005] | 0.0579   |
| Dipeptide 3-4 protFP2 | 0.8818 | [0.7804,0.9964] | 0.0437   |

**Supplementary Table S4. Multivariate Cox regression analysis including position 3-4 composed-dipeptide protFP 2 value, mutation load and age for Pri IDH wild type GBM (n=42).**

| Pri cohort (n=42)     | HR       | 95%CI           | P      |
|-----------------------|----------|-----------------|--------|
| Age                   | 1.024711 | [0.9936,1.0568] | 0.1208 |
| Mutation load         | 1.0052   | [0.9877,1.0230] | 0.5641 |
| Dipeptide 3-4 protFP2 | 0.7868   | [0.6244,0.9915] | 0.0421 |

**Supplementary Table S5. Functional annotation for the lists of genes differentially expressed analyzed by GSEA in TCGA cohort.**

| GENE SET                    | NAME                                                                     | SIZE | ES      | NES     | NOM p-val |
|-----------------------------|--------------------------------------------------------------------------|------|---------|---------|-----------|
| NERVOUS SYSTEM DEVELOPMENT  | GO_REGULATION_OF_CELL_SIZE                                               | 161  | -0.3763 | -1.5820 | 0.0200    |
|                             | GO_CELL_VOLUME_HOMEOSTASIS                                               | 26   | -0.4998 | -1.6130 | 0.0199    |
|                             | GO_REGULATION_OF_EXTENT_OF_CELL_GROWTH                                   | 98   | -0.3821 | -1.4872 | 0.0432    |
|                             | GO_NEGATIVE_REGULATION_OF_AXONOGENESIS                                   | 65   | -0.4853 | -1.7992 | 0.0060    |
|                             | GO_NEGATIVE_REGULATION_OF_CELL_MORPHOGENESIS_INVOLVED_IN_DIFFERENTIATION | 114  | -0.4008 | -1.6149 | 0.0161    |
|                             | GO_REGULATION_OF_AXONOGENESIS                                            | 163  | -0.3987 | -1.6032 | 0.0236    |
|                             | GO_NEGATIVE_REGULATION_OF_NEURON_DIFFERENTIATION                         | 180  | -0.3794 | -1.6456 | 0.0078    |
|                             | GO_NEGATIVE_REGULATION_OF_NERVOUS_SYSTEM_DEVELOPMENT                     | 247  | -0.3620 | -1.5871 | 0.0078    |
|                             | GO_NEGATIVE_REGULATION_OF_CELL_MORPHOGENESIS_INVOLVED_IN_DIFFERENTIATION | 114  | -0.4008 | -1.6149 | 0.0161    |
|                             | GO_NEGATIVE_REGULATION_OF_CELL_DEVELOPMENT                               | 283  | -0.3783 | -1.7265 | 0.0000    |
|                             | GO_REGULATION_OF_GLIAL_CELL_PROLIFERATION                                | 18   | -0.5012 | -1.5460 | 0.0427    |
|                             | GO_REGULATION_OF_NEURON_MIGRATION                                        | 27   | -0.5358 | -1.7249 | 0.0059    |
| FOREBRAIN DEVELOPMENT       | GO_FOREBRAIN_CELL_MIGRATION                                              | 58   | -0.4223 | -1.6291 | 0.0077    |
|                             | GO_CEREBRAL_CORTEX_CELL_MIGRATION                                        | 39   | -0.4377 | -1.5670 | 0.0200    |
|                             | GO_TELENCEPHALON_DEVELOPMENT                                             | 205  | -0.3176 | -1.3907 | 0.0454    |
|                             | GO_TELENCEPHALON_GLIAL_CELL_MIGRATION                                    | 17   | -0.6088 | -1.7113 | 0.0100    |
|                             | GO_CEREBRAL_CORTEX_RADIALY_ORIENTED_CELL_MIGRATION                       | 25   | -0.5699 | -1.8023 | 0.0078    |
| GLIAL CELL DEVELOPMENT      | GO_GLIAL_CELL_MIGRATION                                                  | 34   | -0.4837 | -1.7057 | 0.0059    |
|                             | GO_ASTROCYTE_DEVELOPMENT                                                 | 18   | -0.6128 | -1.8593 | 0.0000    |
|                             | GO_GLIOGENESIS                                                           | 169  | -0.3763 | -1.4899 | 0.0264    |
|                             | GO_GLIAL_CELL_DEVELOPMENT                                                | 73   | -0.4118 | -1.5100 | 0.0336    |
| KIDNEY DEVELOPMENT          | GO_UROGENITAL_SYSTEM_DEVELOPMENT                                         | 287  | -0.3096 | -1.4206 | 0.0288    |
|                             | GO_GLOMERULUS_DEVELOPMENT                                                | 46   | -0.4705 | -1.6512 | 0.0144    |
|                             | GO_METANEPHRIC_NEPHRON_MORPHOGENESIS                                     | 20   | -0.5068 | -1.5361 | 0.0433    |
|                             | GO_METANEPHRIC_NEPHRON_DEVELOPMENT                                       | 31   | -0.4970 | -1.6176 | 0.0181    |
|                             | GO_NEPHRON_DEVELOPMENT                                                   | 110  | -0.3656 | -1.5165 | 0.0335    |
|                             | GO_RENAL_SYSTEM_VASCULATURE_DEVELOPMENT                                  | 18   | -0.6440 | -1.7302 | 0.0161    |
| EPIDERMIS DEVELOPMENT       | GO_REGULATION_OF_EPITHELIAL_CELL_DIFFERENTIATION                         | 112  | -0.3763 | -1.5820 | 0.0200    |
|                             | GO_NEGATIVE_REGULATION_OF_EPIDERMIS_DEVELOPMENT                          | 15   | -0.4998 | -1.6130 | 0.0199    |
|                             | GO_REGULATION_OF_EPIDERMIS_DEVELOPMENT                                   | 59   | -0.3821 | -1.4872 | 0.0432    |
|                             | GO_REGULATION_OF_EPIDERMAL_CELL_DIFFERENTIATION                          | 41   | -0.4853 | -1.7992 | 0.0060    |
|                             | GO_NEGATIVE_REGULATION_OF_EPITHELIAL_CELL_DIFFERENTIATION                | 34   | -0.4008 | -1.6149 | 0.0161    |
| DETECTION OF LIGHT STIMULUS | GO_DETECTION_OF_LIGHT_STIMULUS                                           | 52   | -0.3987 | -1.6032 | 0.0236    |
|                             | GO_DETECTION_OF_VISIBLE_LIGHT                                            | 37   | -0.3794 | -1.6456 | 0.0078    |
|                             | GO_PHOTOTRANSDUCTION                                                     | 39   | -0.3620 | -1.5871 | 0.0078    |
|                             | GO_PHOTOTRANSDUCTION_VISIBLE_LIGHT                                       | 18   | -0.4008 | -1.6149 | 0.0161    |
|                             | GO_SKELETAL_MUSCLE_CELL_DIFFERENTIATION                                  | 49   | -0.4770 | -1.6848 | 0.0105    |
|                             | GO_MUSCLE_TISSUE_DEVELOPMENT                                             | 253  | -0.3172 | -1.4376 | 0.0370    |

|                                     |                                                                   |     |         |         |        |
|-------------------------------------|-------------------------------------------------------------------|-----|---------|---------|--------|
| MUSCLE DEVELOPMENT                  | GO_CARDIAC_VENTRICLE_MORPHOGENESIS                                | 62  | -0.4266 | -1.6523 | 0.0102 |
|                                     | GO_VENTRICULAR_CARDIAC_MUSCLE_TISSUE_DEVELOPMENT                  | 45  | -0.4119 | -1.4828 | 0.0408 |
|                                     | GO_CARDIAC_VENTRICLE_DEVELOPMENT                                  | 103 | -0.3493 | -1.4321 | 0.0459 |
|                                     | GO_CARDIAC_MUSCLE_TISSUE_DEVELOPMENT                              | 130 | -0.3393 | -1.4517 | 0.0492 |
|                                     | GO_CARDIAC_CHAMBER_MORPHOGENESIS                                  | 103 | -0.3637 | -1.4518 | 0.0424 |
|                                     | GO_ATRIOVENTRICULAR_VALVE_DEVELOPMENT                             | 19  | -0.5456 | -1.5728 | 0.0269 |
|                                     | GO_ATRIOVENTRICULAR_VALVE_MORPHOGENESIS                           | 16  | -0.5544 | -1.5179 | 0.0430 |
|                                     | GO_OUTFLOW_TRACT_MORPHOGENESIS                                    | 56  | -0.4390 | -1.6306 | 0.0187 |
| NEGATIVE REGULATION OF ANGIOGENESIS | GO_NEGATIVE_REGULATION_OF_BLOOD_VESSEL_ENDOTHELIAL_CELL_MIGRATION | 24  | -0.3791 | -1.6270 | 0.0103 |
|                                     | GO_NEGATIVE_REGULATION_OF_EPITHELIAL_CELL_MIGRATION               | 53  | -0.5702 | -1.5534 | 0.0478 |
|                                     | GO_NEGATIVE_REGULATION_OF_ENDOTHELIAL_CELL_MIGRATION              | 39  | -0.3559 | -1.4293 | 0.0400 |
|                                     | GO_NEGATIVE_REGULATION_OF_VASCULATURE_DEVELOPMENT                 | 79  | -0.4178 | -1.5265 | 0.0346 |
| ENDOTHELIUM DEVELOPMENT             | GO_MORPHOGENESIS_OF_AN_ENDOTHELIUM                                | 16  | -0.5385 | -1.8107 | 0.0021 |
|                                     | GO_ENDOTHELIUM_DEVELOPMENT                                        | 84  | -0.5350 | -1.6806 | 0.0250 |
|                                     | GO_ENDOTHELIAL_CELL_DIFFERENTIATION                               | 67  | -0.4050 | -1.5413 | 0.0268 |
|                                     | GO_ENDOTHELIAL_CELL_DEVELOPMENT                                   | 43  | -0.4584 | -1.6089 | 0.0335 |
| LIPID KINASE ACTIVITY               | GO_REGULATION_OF_PHOSPHOLIPID_METABOLIC_PROCESS                   | 57  | -0.3955 | -1.5765 | 0.0247 |
|                                     | GO_REGULATION_OF_LIPID_KINASE_ACTIVITY                            | 45  | -0.6210 | -1.7043 | 0.0185 |
|                                     | GO_REGULATION_OF_PHOSPHATIDYLINOSITOL_3_KINASE_ACTIVITY           | 37  | -0.4070 | -1.5577 | 0.0312 |
|                                     | GO_POSITIVE_REGULATION_OF_LIPID_KINASE_ACTIVITY                   | 30  | -0.4084 | -1.5323 | 0.0271 |
| NEGATIVE REGULATION OF ENDOCYTOSIS  | GO_REGULATION_OF_RECEPTOR_INTERNALIZATION                         | 37  | -0.4643 | -1.5897 | 0.0374 |
|                                     | GO_REGULATION_OF_RECEPTOR_MEDIATED_ENDOCYTOSIS                    | 76  | -0.4205 | -1.5133 | 0.0452 |
|                                     | GO_NEGATIVE_REGULATION_OF_RECEPTOR_MEDIATED_ENDOCYTOSIS           | 17  | -0.4623 | -1.6021 | 0.0245 |
|                                     | GO_NEGATIVE_REGULATION_OF_ENDOCYTOSIS                             | 38  | -0.5463 | -1.8176 | 0.0082 |
| CELL CYCLE                          | GO_REGULATION_OF_MEIOTIC_CELL_CYCLE                               | 37  | -0.5633 | -1.8370 | 0.0041 |
|                                     | GO_REGULATION_OF_REPRODUCTIVE_PROCESS                             | 119 | -0.4719 | -1.6415 | 0.0144 |
|                                     | GO_POSITIVE_REGULATION_OF_REPRODUCTIVE_PROCESS                    | 51  | -0.4182 | -1.6087 | 0.0167 |
|                                     | GO_POSITIVE_REGULATION_OF_MULTI_ORGANISM_PROCESS                  | 148 | -0.6680 | -2.0132 | 0.0022 |
|                                     | GO_REGULATION_OF_MEIOTIC_NUCLEAR_DIVISION                         | 26  | -0.4526 | -1.5995 | 0.0276 |
|                                     | GO_POSITIVE_REGULATION_OF_CELL_CYCLE                              | 305 | -0.4041 | -1.5413 | 0.0303 |
|                                     | GO_NEGATIVE_REGULATION_OF_CELL_CYCLE_ARREST                       | 17  | -0.5100 | -1.8460 | 0.0039 |
|                                     | GO_POSITIVE_REGULATION_OF_CELL_DIVISION                           | 119 | -0.4054 | -1.4644 | 0.0321 |
|                                     | GO_POSITIVE_REGULATION_OF_NUCLEAR_DIVISION                        | 59  | -0.6066 | -1.8365 | 0.0060 |
| ACTIN AND CELL BEHAVIOR             | GO_ACTOMYOSIN                                                     | 53  | -0.4592 | -1.5851 | 0.0148 |
|                                     | GO_POSITIVE_REGULATION_OF_LAMELLIPODIUM_ORGANIZATION              | 21  | -0.3330 | -1.4821 | 0.0149 |
|                                     | GO_ACTIN_FILAMENT_BUNDLE                                          | 48  | -0.4802 | -1.7601 | 0.0083 |
|                                     | GO_ACTIN_CYTOSKELETON                                             | 400 | -0.3408 | -1.5084 | 0.0203 |
|                                     | GO_MYOFILAMENT                                                    | 22  | -0.5122 | -1.6343 | 0.0191 |
|                                     | GO_ACTIN_BINDING                                                  | 362 | -0.3071 | -1.3971 | 0.0472 |
|                                     | GO_FILAMENTOUS_ACTIN                                              | 16  | -0.5672 | -1.6450 | 0.0273 |
|                                     | GO_REGULATION_OF_ACTIN_FILAMENT_DEPOLYMERIZATION                  | 46  | -0.3676 | -1.6096 | 0.0061 |
|                                     | GO_POSITIVE_REGULATION_OF_PROTEIN_DEPOLYMERIZATION                | 18  | -0.4140 | -1.6294 | 0.0121 |
|                                     | GO_POSITIVE_REGULATION_OF_PROTEIN_COMPLEX_DISASSEMBLY             | 24  | -0.4813 | -1.6042 | 0.0459 |

**Supplementary Table S6. Functional annotation for the lists of genes differentially expressed analyzed by GSEA in Pri cohort.**

| GENE SET    | NAME                                                                | SIZE | ES      | NES     | NOM p-val |
|-------------|---------------------------------------------------------------------|------|---------|---------|-----------|
| DEVELOPMENT | GO_NEPHRON_EPITHELIUM_DEVELOPMENT                                   | 93   | -0.4751 | -1.6299 | 0.0106    |
|             | GO_NEPHRON_DEVELOPMENT                                              | 115  | -0.4694 | -1.5868 | 0.0298    |
|             | GO_BRANCHING_INVOLVED_IN_URETERIC_BUD_MORPHOGENESIS                 | 44   | -0.5077 | -1.6568 | 0.0108    |
|             | GO_REGULATION_OF_CELL_PROLIFERATION_INVOLVED_IN_HEART_MORPHOGENESIS | 15   | -0.6520 | -1.6017 | 0.0308    |
|             | GO_MESONEPHRIC_TUBULE_MORPHOGENESIS                                 | 53   | -0.4865 | -1.6281 | 0.0168    |
|             | GO_METANEPHRIC_NEPHRON_DEVELOPMENT                                  | 32   | -0.5624 | -1.6702 | 0.0261    |
|             | GO_MESENCHYMAL_TO_EPITHELIAL_TRANSITION                             | 15   | -0.5699 | -1.5512 | 0.0306    |
|             | GO_REGULATION_OF_MESONEPHROS_DEVELOPMENT                            | 26   | -0.5620 | -1.6528 | 0.0063    |
|             | GO_METANEPHROS_MORPHOGENESIS                                        | 28   | -0.4907 | -1.4784 | 0.0273    |
|             | GO_REGULATION_OF_MORPHOGENESIS_OF_A_BRANCHING_STRUCTURE             | 53   | -0.5160 | -1.7473 | 0.0021    |
|             | GO_KIDNEY_MORPHOGENESIS                                             | 82   | -0.4616 | -1.5773 | 0.0068    |
|             | GO_METANEPHROS_DEVELOPMENT                                          | 81   | -0.4828 | -1.6600 | 0.0022    |
|             | GO_POSITIVE_REGULATION_OF_KIDNEY_DEVELOPMENT                        | 41   | -0.4881 | -1.5694 | 0.0107    |
|             | GO_POSITIVE_REGULATION_OF_MESONEPHROS_DEVELOPMENT                   | 22   | -0.5434 | -1.5730 | 0.0145    |
|             | GO_RENAL_TUBULE_DEVELOPMENT                                         | 78   | -0.4704 | -1.5806 | 0.0218    |
|             | GO_DEVELOPMENTAL_INDUCION                                           | 27   | -0.5744 | -1.7504 | 0.0022    |
|             | GO_MESONEPHROS_DEVELOPMENT                                          | 90   | -0.4135 | -1.4647 | 0.0371    |
|             | GO_KIDNEY_EPITHELIUM_DEVELOPMENT                                    | 125  | -0.4409 | -1.5676 | 0.0149    |
|             | GO_KIDNEY_MESENCHYME_DEVELOPMENT                                    | 17   | -0.6525 | -1.7126 | 0.0168    |
|             | GO_REGULATION_OF_ORGAN_FORMATION                                    | 32   | -0.5590 | -1.8287 | 0.0000    |
|             | GO_REGULATION_OF_HEART_MORPHOGENESIS                                | 29   | -0.5182 | -1.5953 | 0.0165    |
|             | GO_ORGAN_INDUCION                                                   | 16   | -0.6573 | -1.8843 | 0.0000    |
|             | GO_SMOOTH_MUSCLE_CELL_DIFFERENTIATION                               | 30   | -0.6063 | -1.6321 | 0.0193    |
|             | GO_MUSCLE_CELL_DIFFERENTIATION                                      | 232  | -0.3789 | -1.4548 | 0.0445    |
|             | GO_POSITIVE_REGULATION_OF_CARDIAC_MUSCLE_CELL_PROLIFERATION         | 19   | -0.5747 | -1.6615 | 0.0143    |
|             | GO_MUSCLE_STRUCTURE_DEVELOPMENT                                     | 422  | -0.3797 | -1.4761 | 0.0297    |
|             | GO_MYOFILAMENT                                                      | 24   | -0.4826 | -1.4807 | 0.0494    |
|             | GO_MUSCLE_ORGAN_DEVELOPMENT                                         | 268  | -0.3722 | -1.4283 | 0.0398    |
|             | GO_REGULATION_OF_CARDIAC_MUSCLE_CELL_PROLIFERATION                  | 29   | -0.4985 | -1.5391 | 0.0186    |
|             | GO_REGULATION_OF_HEART_GROWTH                                       | 42   | -0.4168 | -1.4310 | 0.0319    |
|             | GO_SKELETAL_MUSCLE_ORGAN_DEVELOPMENT                                | 131  | -0.3886 | -1.4271 | 0.0394    |
|             | GO_NEGATIVE_REGULATION_OF_EPITHELIAL_CELL_DIFFERENTIATION           | 37   | -0.5377 | -1.7288 | 0.0000    |
|             | GO_NEGATIVE_REGULATION_OF_EPIDERMIS_DEVELOPMENT                     | 16   | -0.5956 | -1.6537 | 0.0063    |
|             | GO_REGULATION_OF_EPIDERMIS_DEVELOPMENT                              | 63   | -0.4213 | -1.4555 | 0.0227    |
|             | GO_REGULATION_OF_EPIDERMAL_CELL_DIFFERENTIATION                     | 45   | -0.5144 | -1.6747 | 0.0082    |
|             | GO_EMBRYONIC_SKELETAL_SYSTEM_MORPHOGENESIS                          | 93   | -0.5174 | -1.6215 | 0.0201    |
|             | GO_EMBRYONIC_SKELETAL_SYSTEM_DEVELOPMENT                            | 121  | -0.4927 | -1.5897 | 0.0308    |
|             | GO_EMBRYONIC_FORELIMB_MORPHOGENESIS                                 | 32   | -0.6312 | -1.8401 | 0.0022    |
|             | GO_FORELIMB_MORPHOGENESIS                                           | 40   | -0.6591 | -2.0074 | 0.0021    |
|             | GO_HINDLIMB_MORPHOGENESIS                                           | 37   | -0.5516 | -1.6244 | 0.0258    |

|                                                         |                                                                                                                       |     |         |         |        |
|---------------------------------------------------------|-----------------------------------------------------------------------------------------------------------------------|-----|---------|---------|--------|
| CELL FATE                                               | GO_MUSCLE_CELL_FATE_COMMITMENT                                                                                        | 15  | -0.6617 | -1.7801 | 0.0103 |
|                                                         | GO_ECTODERMAL_PLACODE_DEVELOPMENT                                                                                     | 15  | -0.5624 | -1.4811 | 0.0406 |
|                                                         | GO_NEURON_FATE_COMMITMENT                                                                                             | 67  | -0.4510 | -1.4405 | 0.0488 |
|                                                         | GO_CELL_FATE_COMMITMENT_INVOLVED_IN_FORMATION_OF_PRIMAR<br>Y_GERM_LAYER                                               | 28  | -0.4790 | -1.4892 | 0.0471 |
|                                                         | GO_CELL_FATE_COMMITMENT                                                                                               | 226 | -0.3922 | -1.4485 | 0.0489 |
| DNA<br>TRANSCRIPTIO<br>N                                | GO_NUCLEOSOMAL_DNA_BINDING                                                                                            | 30  | -0.5613 | -1.5492 | 0.0398 |
|                                                         | GO_ENHANCER_BINDING                                                                                                   | 92  | -0.5125 | -1.7069 | 0.0000 |
|                                                         | GO_RNA_POLYMERASE_II_DISTAL_ENHANCER_SEQUENCE_SPECIFIC_DN<br>A_BINDING                                                | 64  | -0.5469 | -1.7511 | 0.0020 |
|                                                         | GO_TRANSCRIPTION_FACTOR_ACTIVITY_RNA_POLYMERASE_II_DISTAL<br>ENHANCER_SEQUENCE_SPECIFIC_BINDING                       | 89  | -0.4780 | -1.5828 | 0.0295 |
|                                                         | GO_TRANSCRIPTIONAL_ACTIVATOR_ACTIVITY_RNA_POLYMERASE_II_C<br>ORE_PROMOTER_PROXIMAL_REGION_SEQUENCE_SPECIFIC_BINDING   | 226 | -0.4546 | -1.6407 | 0.0088 |
|                                                         | GO_TRANSCRIPTIONAL_ACTIVATOR_ACTIVITY_RNA_POLYMERASE_II_T<br>RANSCRIPTION_REGULATORY_REGION_SEQUENCE_SPECIFIC_BINDING | 314 | -0.4375 | -1.6303 | 0.0065 |
|                                                         | GO_TRANSCRIPTION_FACTOR_ACTIVITY_RNA_POLYMERASE_II_CORE_P<br>ROMOTER_PROXIMAL_REGION_SEQUENCE_SPECIFIC_BINDING        | 326 | -0.4101 | -1.5091 | 0.0441 |
|                                                         | GO_CORE_PROMOTER_PROXIMAL_REGION_DNA_BINDING                                                                          | 363 | -0.4048 | -1.5120 | 0.0338 |
|                                                         | GO_HMG_BOX_DOMAIN_BINDING                                                                                             | 18  | -0.5867 | -1.5328 | 0.0419 |
| CELL<br>DIFFERENCIATI<br>ON AND<br>PATTERN<br>FORMATION | GO_PROXIMAL_DISTAL_PATTERN_FORMATION                                                                                  | 32  | -0.5980 | -1.8268 | 0.0022 |
|                                                         | GO_ANTERIOR_POSTERIOR_PATTERN_SPECIFICATION                                                                           | 194 | -0.4535 | -1.5828 | 0.0317 |
|                                                         | GO_ANTERIOR_POSTERIOR_AXIS_SPECIFICATION                                                                              | 48  | -0.4958 | -1.5677 | 0.0229 |
|                                                         | GO_EMBRYONIC_PATTERN_SPECIFICATION                                                                                    | 58  | -0.4441 | -1.5373 | 0.0185 |
|                                                         | GO_AXIS_SPECIFICATION                                                                                                 | 90  | -0.4567 | -1.5399 | 0.0235 |
| AA<br>BIOSYNTHETIC<br>AND<br>METABOLIC                  | GO_METHIONINE_METABOLIC_PROCESS                                                                                       | 18  | -0.6747 | -1.7151 | 0.0040 |
|                                                         | GO_SULFUR_AMINO_ACID_BIOSYNTHETIC_PROCESS                                                                             | 19  | -0.5899 | -1.5468 | 0.0413 |
|                                                         | GO_ASPARTATE_FAMILY_AMINO_ACID_BIOSYNTHETIC_PROCESS                                                                   | 23  | -0.5939 | -1.5312 | 0.0276 |
|                                                         | GO_SULFUR_AMINO_ACID_METABOLIC_PROCESS                                                                                | 40  | -0.5547 | -1.6136 | 0.0079 |
| PHOSPHATIDYL<br>CHOLINE<br>METABOLIC                    | GO_LYSOPHOSPHOLIPASE_ACTIVITY                                                                                         | 20  | -0.5709 | -1.6967 | 0.0042 |
|                                                         | GO_PHOSPHOLIPASE_A2_ACTIVITY                                                                                          | 31  | -0.5016 | -1.6308 | 0.0121 |
|                                                         | GO_PHOSPHATIDYLETHANOLAMINE_ACYL_CHAIN_REMODELING                                                                     | 23  | -0.5646 | -1.6702 | 0.0041 |
|                                                         | GO_PHOSPHATIDYLSERINE_METABOLIC_PROCESS                                                                               | 28  | -0.4944 | -1.5093 | 0.0265 |
|                                                         | GO_PHOSPHATIDYLCHOLINE_ACYL_CHAIN_REMODELING                                                                          | 26  | -0.4962 | -1.5195 | 0.0244 |
|                                                         | GO_PHOSPHATIDYLCHOLINE_ACYL_CHAIN_REMODELING                                                                          | 26  | -0.4962 | -1.5195 | 0.0244 |
| DNA<br>CATABOLIC                                        | GO_APOPTOTIC_DNA_FRAGMENTATION                                                                                        | 15  | -0.6423 | -1.6850 | 0.0084 |
|                                                         | GO_DNA_CATABOLIC_PROCESS_ENDONUCLEOLYTIC                                                                              | 19  | -0.6155 | -1.6531 | 0.0167 |
|                                                         | GO_DNA_CATABOLIC_PROCESS                                                                                              | 27  | -0.5160 | -1.4684 | 0.0354 |
|                                                         | GO_NUCLEASE_ACTIVITY                                                                                                  | 196 | -0.4428 | -1.5150 | 0.0438 |
|                                                         | GO_ENDODEOXYRIBONUCLEASE_ACTIVITY                                                                                     | 49  | -0.5508 | -1.7097 | 0.0083 |
|                                                         | GO_DEOXYRIBONUCLEASE_ACTIVITY                                                                                         | 65  | -0.5413 | -1.6832 | 0.0042 |
|                                                         | GO_EXONUCLEASE_ACTIVITY                                                                                               | 76  | -0.5044 | -1.5316 | 0.0493 |
|                                                         | GO_EXODEOXYRIBONUCLEASE_ACTIVITY                                                                                      | 15  | -0.6494 | -1.5721 | 0.0285 |
|                                                         | GO_ENDONUCLEASE_ACTIVITY_ACTIVE_WITH_EITHER_RIBO_OR_DEOX<br>YRIBONUCLEIC ACIDS AND PRODUCING 3 PHOSPHOMONOESTERS      | 19  | -0.5400 | -1.4735 | 0.0432 |

**Supplementary Table S7. Compare the effects with others methods.**

| Model         | AUC(TCGA) | P-value(KM) |
|---------------|-----------|-------------|
| neoDL         | 0.988     | 1.65E-07    |
| Random Forest | 0.963     | 1.08E-07    |
| SVM           | 0.952     | 7.4E-06     |

**Supplementary Table S8. total features.**

| Features                                                                                                                                                         | Calculated site                                                                             |                                                        |                                                           |
|------------------------------------------------------------------------------------------------------------------------------------------------------------------|---------------------------------------------------------------------------------------------|--------------------------------------------------------|-----------------------------------------------------------|
| Physical - chemical properties                                                                                                                                   |                                                                                             |                                                        |                                                           |
| hydrophobicity index; hydrophobic moment; theoretical net charge ; molecular weight ; Boman (Potential Protein Interaction) index; aliphatic index               | the mutant peptide;Mutation position                                                        | site 1 and 2 compose-dipeptide of the mutant peptide   | site 1 to 3 compose-tripeptide of the mutant peptide      |
|                                                                                                                                                                  | the absolute site 1/2/3/4/5/6/7/8/9 of the mutant peptide                                   | site 2 and 3 compose-dipeptide of the mutant peptide   | site 2 to 4 compose-tripeptide of the mutant peptide      |
|                                                                                                                                                                  | dipeptide composed of the mutation position and the previous one of the mutant peptide      | site 3 and 4 compose-dipeptide of the mutant peptide   | site 3 to 5 compose-tripeptide of the mutant peptide      |
|                                                                                                                                                                  | tripeptide consisting of the mutation position and the first two of the mutation peptide    | site 4 and 5 compose-dipeptide of the mutant peptide   | site 4 to 6 compose-tripeptide of the mutant peptide      |
|                                                                                                                                                                  | tripeptide consisting of the mutated position and the last two of the mutated peptide;      | site 5 and 6 compose-dipeptide of the mutant peptide   | site 5 to 7 compose-tripeptide of the mutant peptide      |
|                                                                                                                                                                  | dipeptide composed of the mutation position and the latter of the mutant peptide;           | site 6 and 7 compose-dipeptide of the mutant peptide   | site 6 to 8 compose-tripeptide of the mutant peptide      |
|                                                                                                                                                                  | tripeptide consisting of one bit before to one bit after the mutation of the mutant peptide | site 7 and 8 compose-dipeptide of the mutant peptide   | site 7 to 9 compose-tripeptide of the mutant peptide      |
|                                                                                                                                                                  | changes at mutant positions during the mutation                                             | site 8 and 9 compose-dipeptide of the mutant peptide   | changes during mutation                                   |
| auto-correlation index ; auto-covariance index ; cross-covariance index                                                                                          | the mutant peptide; changes during mutation                                                 |                                                        |                                                           |
| instability index                                                                                                                                                | the mutant peptide;                                                                         | site 1 to 3 compose-tripeptide of the mutant peptide   | site 2 to 4 compose-tripeptide of the mutant peptide      |
|                                                                                                                                                                  | changes during mutation                                                                     | site 5 to 7 compose-tripeptide of the mutant peptide   | site 3 to 5 compose-tripeptide of the mutant peptide      |
|                                                                                                                                                                  | tripeptide consisting of the mutated position and the last two of the mutated peptide       | site 6 to 8 compose-tripeptide of the mutant peptide   | site 4 to 6 compose-tripeptide of the mutant peptide      |
|                                                                                                                                                                  | tripeptide consisting of the mutation position and the first two of the mutation peptide    | site 7 to 9 compose-tripeptide of the mutant peptide   |                                                           |
| aaComp                                                                                                                                                           |                                                                                             |                                                        |                                                           |
| aaComp :Tiny ;Small ;Aliphatic ;Aromatic;Nonpolar ;Polar ;Charged ;Basic ;Acidic                                                                                 | the mutant peptide;                                                                         | site 1 and 2 compose-dipeptide of the mutant peptide   | site 1 to 3 compose-tripeptide of the mutant peptide      |
|                                                                                                                                                                  | dipeptide composed of the mutation position and the latter of the mutant peptide            | site 2 and 3 compose-dipeptide of the mutant peptide   | site 2 to 4 compose-tripeptide of the mutant peptide      |
|                                                                                                                                                                  | tripeptide consisting of the mutated position and the last two of the mutated peptide       | site 3 and 4 compose-dipeptide of the mutant peptide   | site 3 to 5 compose-tripeptide of the mutant peptide      |
|                                                                                                                                                                  | tripeptide consisting of the mutation position and the first two of the mutation peptide    | site 4 and 5 compose-dipeptide of the mutant peptide   | site 4 to 6 compose-tripeptide of the mutant peptide      |
|                                                                                                                                                                  | changes during mutation                                                                     | site 5 and 6 compose-dipeptide of the mutant peptide   | site 5 to 7 compose-tripeptide of the mutant peptide      |
|                                                                                                                                                                  | Mutation position                                                                           | site 6 and 7 compose-dipeptide of the mutant peptide   | site 6 to 8 compose-tripeptide of the mutant peptide      |
|                                                                                                                                                                  | changes at mutant positions during the mutation                                             | site 7 and 8 compose-dipeptide of the mutant peptide   | site 7 to 9 compose-tripeptide of the mutant peptide      |
|                                                                                                                                                                  | dipeptide composed of the mutation position and the previous one of the mutant peptide      | site 8 and 9 compose-dipeptide of the mutant peptide   | the absolute site 1/2/3/4/5/6/7/8/9 of the mutant peptide |
| aaComp: change                                                                                                                                                   | Tiny->small at mutant position during mutation                                              | small->Tiny at mutant position during mutation         | Aliphatic->Aromatic at mutant position during mutation    |
|                                                                                                                                                                  | Polar ->Nonpolar at mutant position during mutation                                         | Basic -> Acidic at mutant position during mutation     | Acidic ->Basic at mutant position during mutation         |
|                                                                                                                                                                  | Nonpolar -> Polar at mutant position during mutation                                        | Aromatic->Aliphatic at mutant position during mutation |                                                           |
| 66 descriptors for amino acid                                                                                                                                    |                                                                                             |                                                        |                                                           |
| Cruciani properties; Kidera factors; Z-scales; FASGAI vectors ; T-scales' VHSE-scales ; protFP descriptors; ST-scales; BLOSUM62 derived indices ; MS-WHIM scores | the mutant peptide;                                                                         | site 1 and 2 compose-dipeptide of the mutant peptide   | site 1 to 3 compose-tripeptide of the mutant peptide      |
|                                                                                                                                                                  | Mutation position                                                                           | site 2 and 3 compose-dipeptide of the mutant peptide   | site 2 to 4 compose-tripeptide of the mutant peptide      |
|                                                                                                                                                                  | dipeptide composed of the mutation position and the previous one of the mutant peptide      | site 3 and 4 compose-dipeptide of the mutant peptide   | site 3 to 5 compose-tripeptide of the mutant peptide      |
|                                                                                                                                                                  | dipeptide composed of the mutation position and the latter of the mutant peptide            | site 4 and 5 compose-dipeptide of the mutant peptide   | site 4 to 6 compose-tripeptide of the mutant peptide      |
|                                                                                                                                                                  | tripeptide consisting of the mutation position and the first two of the mutation peptide    | site 5 and 6 compose-dipeptide of the mutant peptide   | site 5 to 7 compose-tripeptide of the mutant peptide      |
|                                                                                                                                                                  | tripeptide consisting of the mutated position and the last two of the mutated peptide       | site 6 and 7 compose-dipeptide of the mutant peptide   | site 6 to 8 compose-tripeptide of the mutant peptide      |
|                                                                                                                                                                  | the absolute site 1/2/3/4/5/6/7/8/9 of the mutant peptide                                   | site 7 and 8 compose-dipeptide of the mutant peptide   | site 7 to 9 compose-tripeptide of the mutant peptide      |
|                                                                                                                                                                  | tripeptide consisting of one bit before to one bit after the mutation of the mutant peptide | site 8 and 9 compose-dipeptide of the mutant peptide   |                                                           |
|                                                                                                                                                                  | changes at mutant positions during the mutation                                             |                                                        |                                                           |

| Features                                        | Calculated site                                                                                                                                                                                                     |                                                                                                                                                                                                                                                                                                                                                        |                                                                                                                                                                                                                                          |                                                                                                                                                                                                                                          |
|-------------------------------------------------|---------------------------------------------------------------------------------------------------------------------------------------------------------------------------------------------------------------------|--------------------------------------------------------------------------------------------------------------------------------------------------------------------------------------------------------------------------------------------------------------------------------------------------------------------------------------------------------|------------------------------------------------------------------------------------------------------------------------------------------------------------------------------------------------------------------------------------------|------------------------------------------------------------------------------------------------------------------------------------------------------------------------------------------------------------------------------------------|
| Amino acid composition                          |                                                                                                                                                                                                                     |                                                                                                                                                                                                                                                                                                                                                        |                                                                                                                                                                                                                                          |                                                                                                                                                                                                                                          |
| Amino Acid type: 20 amino acid type             | Mutation position<br>The first three positions of the mutant peptide                                                                                                                                                | The first two positions of the mutant peptide<br>The last two positions of the mutant peptide                                                                                                                                                                                                                                                          | The middle three positions of the mutant peptide<br>The last three positions of the mutant peptide                                                                                                                                       | the first position of the mutant peptide<br>the last position of the mutant peptide                                                                                                                                                      |
| Entropy                                         | the mutant peptide;<br>dipeptide composed of the mutation position and the previous one of the mutant peptide<br>tripeptide consisting of one bit before to one bit after the mutation of the mutant peptide        | tripeptide consisting of the mutated position and the last two of the mutated peptide<br>tripeptide consisting of the mutation position and the first two of the mutation peptide                                                                                                                                                                      | dipeptide composed of the mutation position and the latter of the mutant peptide<br>changes during mutant process                                                                                                                        |                                                                                                                                                                                                                                          |
| entropyseq                                      | Amino Acid Type(20) of wild type peptide<br><br>Amino Acid Type(20) of mutant type peptide<br><br>changes of dipeptide composed of the mutation position and the previous one of the mutant peptide during mutation | changes of tripeptide consisting of the mutated position and the last two of the mutated peptide during mutation<br>changes of tripeptide consisting of the mutation position and the first two of the mutation peptide during mutation<br>changes of dipeptide composed of the mutation position and the latter of the mutant peptide during mutation | site 1 and 2 compose-dipeptide of the mutant peptide<br><br>site 2 and 3 compose-dipeptide of the mutant peptide<br><br>site 3 and 4 compose-dipeptide of the mutant peptide<br><br>site 7 and 8 compose-dipeptide of the mutant peptide | site 4 and 5 compose-dipeptide of the mutant peptide<br><br>site 5 and 6 compose-dipeptide of the mutant peptide<br><br>site 6 and 7 compose-dipeptide of the mutant peptide<br><br>site 8 and 9 compose-dipeptide of the mutant peptide |
| Mutation position in the top three              |                                                                                                                                                                                                                     |                                                                                                                                                                                                                                                                                                                                                        |                                                                                                                                                                                                                                          |                                                                                                                                                                                                                                          |
| Mutation position in the middle three positions |                                                                                                                                                                                                                     |                                                                                                                                                                                                                                                                                                                                                        |                                                                                                                                                                                                                                          |                                                                                                                                                                                                                                          |
| Mutation position in the last three positions   |                                                                                                                                                                                                                     |                                                                                                                                                                                                                                                                                                                                                        |                                                                                                                                                                                                                                          |                                                                                                                                                                                                                                          |

## Supplementary Table S9. 189 valid features.

---

### Feature annotation

---

auto-correlation index of mutant peptide

auto-covariance index of mutant peptide

molecular weight of the dipeptide composed of the mutation position and the previous one of the mutant peptide

instability index of tripeptide consisting of the mutation position and the first two digits of the mutant peptide

hydrophobicity index at the absolute site 4 of the mutant peptide

Hydrophobicity index of site 3 and 4 compose-dipeptide of the mutant peptide

molecular weight of site 3 and 4 compose-dipeptide of the mutant peptide

molecular weight of site 2 to 4 compose-tripeptide of the mutant peptide

Boman (Potential Protein Interaction) index at the absolute site 4 of the mutant peptide

Boman (Potential Protein Interaction) index of site 3 and 4 compose-dipeptide of the mutant peptide

aliphatic index at the absolute site 4 of the mutant peptide

aliphatic index of site 3 and 4 compose-dipeptide of the mutant peptide

aliphatic index of site 6 and 7 compose-dipeptide of the mutant peptide

aliphatic index of site 5 to 7 compose-tripeptide of the mutant peptide

aliphatic index of site 6 to 8 compose-tripeptide of the mutant peptide

The tripeptide composed of site 2 to 4 of the mutant peptide contains Aliphatic amino acids number

The tripeptide composed of site 2 to 4 of the mutant peptide contains Nonpolar amino acids number

The tripeptide composed of site 2 to 4 of the mutant peptide contains Polar amino acids number

The tripeptide composed of site 3 to 5 of the mutant peptide contains Nonpolar amino acids number

The tripeptide composed of site 3 to 5 of the mutant peptide contains Polar amino acids number

The tripeptide composed of site 5 to 7 of the mutant peptide contains Aromatic amino acids number

The tripeptide composed of site 5 to 7 of the mutant peptide contains Basic amino acids number

FASGAI vectors F3 value at the mutant position of mutant peptide

T-scales T1 value at the mutant position of mutant peptide

VHSE-scales VHSE2 value at the mutant position of mutant peptide

protFP descriptors protFP5 at the mutant position of mutant peptide

ST-scales ST1 value at the mutant position of mutant peptide

BLOSUM62 derived indices BLOSUM4 at the mutant position of mutant peptide

Cruciani properties PP2 value of the dipeptide composed of the mutation position and the previous one of the mutant peptide

Kidera factors KF2 value of the dipeptide composed of the mutation position and the previous one of the mutant peptide

FASGAI vectors F3 value value of the dipeptide composed of the mutation position and the previous one of the mutant peptide

T-scales T1 value of the dipeptide composed of the mutation position and the previous one of the mutant peptide

VHSE-scales VHSE2 value of the dipeptide composed of the mutation position and the previous one of the mutant peptide

VHSE-scales VHSE3 value of the dipeptide composed of the mutation position and the previous one of the mutant peptide

ST-scales ST1 value of the dipeptide composed of the mutation position and the previous one of the mutant peptide

BLOSUM62 derived indices BLOSUM4 value of the dipeptide composed of the mutation position and the previous one of the mutant peptide

VHSE-scales VHSE2 value of the dipeptide composed of the mutation position and the latter of the mutant peptide

ST-scales ST4 value of the dipeptide composed of the mutation position and the latter of the mutant peptide

BLOSUM62 derived indices BLOSUM4 value of the dipeptide composed of the mutation position and the latter of the mutant peptide

BLOSUM62 derived indices BLOSUM7 value of the dipeptide composed of the mutation position and the latter of the mutant peptide

VHSE-scales VHSE2 value of the tripeptide consisting of the mutation position and the first two of the mutation peptide

BLOSUM62 derived indices BLOSUM4 value of the tripeptide consisting of the mutation position and the first two of the mutation peptide

BLOSUM62 derived indices BLOSUM9 value of the tripeptide consisting of the mutation position and the first two of the mutation peptide

ST-scales ST8 value for tripeptide consisting of the mutated position and the last two of the mutated peptide

BLOSUM62 derived indices BLOSUM7 value or tripeptide consisting of the mutated position and the last two of the mutated peptide

changes in the number of Aromatic amino acids during the mutation process

changes in the number of Aromatic amino acids at the mutation site during mutation process

---

---

The dipeptide composed of site 3 and 4 of the mutant peptide contains Alipahitic amino acids number

The dipeptide composed of site 3 and 4 of the mutant peptide contains Nonpolar amino acids number

The dipeptide composed of site 3 and 4 of the mutant peptide contains Polar amino acids number

The dipeptide composed of site 4 and 5 of the mutant peptide contains Alipahitic amino acids number

The dipeptide composed of site 4 and 5 of the mutant peptide contains Nonpolar amino acids number

The dipeptide composed of site 4 and 5 of the mutant peptide contains Polar amino acids number

The dipeptide composed of site 6 and 7 of the mutant peptide contains Alipahitic amino acids number

The dipeptide composed of site 7 and 8 of the mutant peptide contains Aromatic amino acids number

The dipeptide composed of site 7 and 8 of the mutant peptide contains Basic amino acids number

Mutant peptide with Alipahitic amino acid at position 4

Mutant peptide with Nonpolar amino acid at position 4

Mutant peptide with Polar amino acid at position 4

Mutant peptide with Charge amino acid at position 4

Mutant peptide with Small amino acid at position 5

Mutant peptide with Aromatic amino acid at position 5

Mutant peptide with Basic amino acid at position 5

Mutant peptide with Basic amino acid at position 7

The mutation position of the mutant peptide is W amino acid

The first three positions of the mutant peptide are present F amino acids

The middle three positions of the mutant peptide are present A amino acids

The first two presence of mutant peptides are present F amino acids

The first position of the mutant peptide is the F amino acid

Changes of Kidera factors KF4 value during mutation

Changes of Z-scales Z1 value during mutation

Changes of FASGAI vectors F3 value during mutation

Changes of VHSE-scales VHSE1 value during mutation

Changes of BLOSUM62 derived indices BLOSUM1 value during mutation

Changes in Kidera factor KF4 values at mutant positions during the mutation

Changes of Z-scale Z1 value at mutant positions during the mutation

changes of FASGAI vectors F3 value at mutant positions during the mutation

Change of VHSE-scales VHSE1 value at mutant positions during the mutation

Changes of BLOSUM62 derived indices BLOSUM1 value at mutant positions during the mutation

BLOSUM62 derived indices BLOSUM4 value of the tripeptide consisting of one bit before to one bit after the mutation of the mutant peptide

BLOSUM62 derived indices BLOSUM7 value of the tripeptide consisting of one bit before to one bit after the mutation of the mutant peptide

Entropy of a residue type of amino acid N in wildtype peptide

Entropy of a residue type of amino acid W in wildtype peptide

protFP descriptors protFP8 value for tripeptide consisting of the mutated position and the last two of the mutated peptide

BLOSUM62 derived indices BLOSUM4 value at the absolute site 2 of the mutant peptide

Cruciani properties PP3 value at the absolute site 3 of the mutant peptide

Z-scales Z2 value at the absolute site 3 of the mutant peptide

VHSE-scales VHSE1 value at the absolute site 3 of the mutant peptide

ST-scales ST4 value at the absolute site 3 of the mutant peptide

BLOSUM62 derived indices BLOSUM7 value at the absolute site 3 of the mutant peptide

Cruciani properties PP1 value at the absolute site 4 of the mutant peptide

Kidera factors KF4 value at the absolute site 4 of the mutant peptide

Z-scales Z4 value at the absolute site 4 of the mutant peptide

Z-scales Z2 value at the absolute site 4 of the mutant peptide

FASGAI vector F4 value at the absolute site 4 of the mutant peptide

T-scales T4 value at the absolute site 4 of the mutant peptide

---

---

VHSE-scales VHSE1 value at the absolute site 4 of the mutant peptide

VHSE-scales VHSE2 value at the absolute site 4 of the mutant peptide

VHSE-scales VHSE6 value at the absolute site 4 of the mutant peptide

protFP descriptors protFP2 value at the absolute site 4 of the mutant peptide

protFP descriptors protFP8 value at the absolute site 4 of the mutant peptide

ST-scales ST4 value at the absolute site 4 of the mutant peptide

ST-scales ST5 value at the absolute site 4 of the mutant peptide

BLOSUM62 derived indices BLOSUM7 value at the absolute site 4 of the mutant peptide

Z-scales Z4 value at the absolute site 5 of the mutant peptide

FASGAI vector F6 value at the absolute site 5 of the mutant peptide

VHSE-scales VHSE5 value at the absolute site 5 of the mutant peptide

ST-scales ST3 value at the absolute site 5 of the mutant peptide

BLOSUM62 derived indices BLOSUM9 value at the absolute site 5 of the mutant peptide

VHSE-scales VHSE5 value at the absolute site 6 of the mutant peptide

Cruciani properties PP3 value at the absolute site 7 of the mutant peptide

Kidera factors KF10 value at the absolute site 7 of the mutant peptide

T-scales T5 value at the absolute site 7 of the mutant peptide

VHSE-scales VHSE6 value at the absolute site 7 of the mutant peptide

BLOSUM62 derived indices BLOSUM5 value at the absolute site 7 of the mutant peptide

Kidera factors KF8 value at the absolute site 8 of the mutant peptide

BLOSUM62 derived indices BLOSUM10 value of site 1 and 2 compose-dipeptide of the mutant peptide

BLOSUM62 derived indices BLOSUM9 value of site 4 to 6 compose-tripeptide of the mutant peptide

Kidera factors KF10 value of site 7 to 9 compose-tripeptide of the mutant peptide

ST-scales ST4 value of site 2 and 3 compose-dipeptide of the mutant peptide

Cruciani properties PP1 value of site 3 and 4 compose-dipeptide of the mutant peptide

Kidera factors KF2 value of site 3 and 4 compose-dipeptide of the mutant peptide

Z-scales Z2 value of site 3 and 4 compose-dipeptide of the mutant peptide

FASGAI vector F4 value of site 3 and 4 compose-dipeptide of the mutant peptide

T-scales T1 value of site 3 and 4 compose-dipeptide of the mutant peptide

T-scales T4 value of site 3 and 4 compose-dipeptide of the mutant peptide

VHSE-scales VHSE2 value of site 3 and 4 compose-dipeptide of the mutant peptide

VHSE-scales VHSE3 value of site 3 and 4 compose-dipeptide of the mutant peptide

VHSE-scales VHSE6 value of site 3 and 4 compose-dipeptide of the mutant peptide

protFP descriptors protFP2 value of site 3 and 4 compose-dipeptide of the mutant peptide

protFP descriptors protFP4 value of site 3 and 4 compose-dipeptide of the mutant peptide

ST-scales ST1 value of site 3 and 4 compose-dipeptide of the mutant peptide

ST-scales ST4 value of site 3 and 4 compose-dipeptide of the mutant peptide

ST-scales ST5 value of site 3 and 4 compose-dipeptide of the mutant peptide

BLOSUM62 derived indices BLOSUM2 value of site 3 and 4 compose-dipeptide of the mutant peptide

BLOSUM62 derived indices BLOSUM7 value of site 3 and 4 compose-dipeptide of the mutant peptide

MS-WHIM scores MSWHIM1 value of site 3 and 4 compose-dipeptide of the mutant peptide

Cruciani properties PP1 value of site 4 and 5 compose-dipeptide of the mutant peptide

ST-scales ST3 value of site 4 and 5 compose-dipeptide of the mutant peptide

ST-scales ST5 value of site 4 and 5 compose-dipeptide of the mutant peptide

BLOSUM62 derived indices BLOSUM7 value of site 4 and 5 compose-dipeptide of the mutant peptide

BLOSUM62 derived indices BLOSUM9 value of site 4 and 5 compose-dipeptide of the mutant peptide

BLOSUM62 derived indices BLOSUM9 value of site 5 and 6 compose-dipeptide of the mutant peptide

Cruciani properties PP1 value of site 6 and 7 compose-dipeptide of the mutant peptide

Kidera factors KF10 value of site 6 and 7 compose-dipeptide of the mutant peptide

T-scales T4 value of site 6 and 7 compose-dipeptide of the mutant peptide

VHSE-scales VHSE6 value of site 6 and 7 compose-dipeptide of the mutant peptide

protFP descriptors protFP5 value of site 6 and 7 compose-dipeptide of the mutant peptide

BLOSUM62 derived indices BLOSUM8 value of site 6 and 7 compose-dipeptide of the mutant peptide

---

---

Cruciani properties PP3 value of site 7 and 8 compose-dipeptide of the mutant peptide  
Kidera factors KF10 value of site 7 and 8 compose-dipeptide of the mutant peptide  
Z-scales Z4 value of site 7 and 8 compose-dipeptide of the mutant peptide  
FASGAI vector F6 value of site 7 and 8 compose-dipeptide of the mutant peptide  
protFP descriptors protFP5 value of site 7 and 8 compose-dipeptide of the mutant peptide  
ST-scales ST2 value of site 7 and 8 compose-dipeptide of the mutant peptide  
Cruciani properties PP1 value of site 2 to 4 compose-tripeptide of the mutant peptide  
Kidera factors KF2 value of site 2 to 4 compose-tripeptide of the mutant peptide  
Z-scales Z2 value of site 2 to 4 compose-tripeptide of the mutant peptide  
T-scales T1 value of site 2 to 4 compose-tripeptide of the mutant peptide  
T-scales T4 value of site 2 to 4 compose-tripeptide of the mutant peptide  
VHSE-scales VHSE2 value of site 2 to 4 compose-tripeptide of the mutant peptide  
VHSE-scales VHSE6 value of site 2 to 4 compose-tripeptide of the mutant peptide  
protFP descriptors protFP2 value of site 2 to 4 compose-tripeptide of the mutant peptide  
ST-scales ST1 value of site 2 to 4 compose-tripeptide of the mutant peptide  
ST-scales ST4 value of site 2 to 4 compose-tripeptide of the mutant peptide  
ST-scales ST5 value of site 2 to 4 compose-tripeptide of the mutant peptide  
BLOSUM62 derived indices BLOSUM2 value of site 2 to 4 compose-tripeptide of the mutant peptide  
BLOSUM62 derived indices BLOSUM7 value of site 2 to 4 compose-tripeptide of the mutant peptide  
MS-WHIM scores MSWHIM1 value of site 2 to 4 compose-tripeptide of the mutant peptide  
Cruciani properties PP1 value of site 3 to 5 compose-tripeptide of the mutant peptide  
T-scales T3 value of site 3 to 5 compose-tripeptide of the mutant peptide  
VHSE-scales VHSE2 value of site 3 to 5 compose-tripeptide of the mutant peptide  
VHSE-scales VHSE5 value of site 3 to 5 compose-tripeptide of the mutant peptide  
protFP descriptors protFP4 value of site 3 to 5 compose-tripeptide of the mutant peptide  
ST-scales ST4 value of site 3 to 5 compose-tripeptide of the mutant peptide  
ST-scales ST5 value of site 3 to 5 compose-tripeptide of the mutant peptide  
BLOSUM62 derived indices BLOSUM7 value of site 3 to 5 compose-tripeptide of the mutant peptide  
BLOSUM62 derived indices BLOSUM9 value of site 3 to 5 compose-tripeptide of the mutant peptide  
FASGAI vector F4 value of site 5 to 7 compose-tripeptide of the mutant peptide  
T-scales T4 value of site 5 to 7 compose-tripeptide of the mutant peptide  
VHSE-scales VHSE6 value of site 5 to 7 compose-tripeptide of the mutant peptide  
protFP descriptors protFP5 value of site 5 to 7 compose-tripeptide of the mutant peptide  
BLOSUM62 derived indices BLOSUM2 value of site 5 to 7 compose-tripeptide of the mutant peptide  
BLOSUM62 derived indices BLOSUM9 value of site 5 to 7 compose-tripeptide of the mutant peptide  
MS-WHIM scores MSWHIM1 value of site 5 to 7 compose-tripeptide of the mutant peptide  
Kidera factors KF10 value of site 6 to 8 compose-tripeptide of the mutant peptide  
Z-scales Z5 value of site 6 to 8 compose-tripeptide of the mutant peptide  
VHSE-scales VHSE6 value of site 6 to 8 compose-tripeptide of the mutant peptide  
protFP descriptors protFP5 value of site 6 to 8 compose-tripeptide of the mutant peptide

---
